# Supplementary material
Source: PubMed Central journal article supplement (PMC5809736)
Supplement: JVI.01744-17_zjv005183329s1.pdf [file JVI.01744-17_zjv005183329s1.pdf]

The partitivirus HetPV13-an1 mediates severe growth debilitation and major alterations in the gene expression of a fungal forest pathogen

Eeva J. Vainio, Jaana Jurvansuu, Rafiqul Hyder, Muhammad Kashif, Tuula Piri, Tero

Tuomivirta, Anna Poimala, Ping Xu, Salla Mäkelä, Dina Nitisa, Jarkko Hantula

## Supplemental Material for Publication

**Table S1. Mapping statistics for the RNA-Seq data.** *H. annosum* 94233 is infected with HetPV13-an1 and 94233/32D is an isogenic strain free of HetPV13-an1, and each strain was analyzed using three biological replicates.

| Sample id   | Number of reads | Number of reads mapped to reference genome | Percentage of mapped reads from all reads | Uniquely aligned reads | Reads mapped to more than one genome location | Reads not mapped to reference genome | Percentage of uniquely mapped reads |
|-------------|-----------------|--------------------------------------------|-------------------------------------------|------------------------|-----------------------------------------------|--------------------------------------|-------------------------------------|
| 94233_1     | 19165920        | 13121029                                   | 68.46%                                    | 12778315               | 342714                                        | 6044891                              | 97.4%                               |
| 94233_2     | 19189260        | 13111270                                   | 68.33%                                    | 12785264               | 326006                                        | 6077990                              | 97.5%                               |
| 94233_3     | 19239707        | 12798798                                   | 66.52%                                    | 12449933               | 348865                                        | 6440909                              | 97.3%                               |
| 94233/32D_1 | 21666839        | 14917271                                   | 68.85%                                    | 14570928               | 346343                                        | 6749568                              | 97.7%                               |
| 94233/32D_2 | 18132529        | 12587443                                   | 69.42%                                    | 12301201               | 286242                                        | 5545086                              | 97.7%                               |
| 94233/32D_3 | 17921554        | 12437311                                   | 69.40%                                    | 12160000               | 277311                                        | 5484243                              | 97.8%                               |

**Table S2. List of RNA-Seq fold changes (FC), reference gene names and probable functions for the downregulated (negative FC) and upregulated (positive FC) transcripts detected in this study.** The gene names refer to the *H. annosum* v.2.0 genome sequence deposited at the JGI (<http://genome.jgi.doe.gov/Hetan2/Hetan2.home.html>).

| No. | FC       | Name            | Protein                                                               | Function                                   |
|-----|----------|-----------------|-----------------------------------------------------------------------|--------------------------------------------|
| 1   | -7.253   | e_gw1.01.1262.1 | -                                                                     |                                            |
| 2   | -32.406  | e_gw1.01.2047.1 | -                                                                     |                                            |
| 3   | -15.308  | e_gw1.01.2531.1 | fructosamine-3-kinase                                                 | Carbohydrate metabolism<br>mannitol cycle? |
| 4   | -23.817  | e_gw1.01.3559.1 | Mitotic spindle checkpoint protein (mad2)                             | Cell cycle control<br>/DNA damage          |
| 5   | -18.976  | e_gw1.01.3602.1 | Ser-Thr-rich glycosyl-phosphatidyl-inositol-anchored membrane protein | Cell wall organisation<br>/Fruiting body   |
| 6   | -5.704   | e_gw1.02.3514.1 | Mannitol dehydrogenase                                                | Carbohydrate metabolism<br>mannitol cycle  |
| 7   | 9.137    | e_gw1.03.1624.1 |                                                                       |                                            |
| 8   | -12.36   | e_gw1.03.1854.1 | -                                                                     |                                            |
| 9   | -4.151   | e_gw1.03.2572.1 | Ribonuclease?                                                         |                                            |
| 10  | -104.712 | e_gw1.03.373.1  | -                                                                     |                                            |
| 11  | -19.299  | e_gw1.03.569.1  | -                                                                     |                                            |
| 12  | -13.829  | e_gw1.04.1225.1 | amidoligase                                                           | N-metabolism                               |
| 13  | -6.17    | e_gw1.04.1596.1 |                                                                       |                                            |
| 14  | -6.116   | e_gw1.04.2808.1 | small heat-shock protein Hsp26/Hsp42                                  | Chaperone                                  |
| 15  | -23.478  | e_gw1.05.105.1  | Cytochrome P450                                                       | oxidative degradation                      |
| 16  | -4.041   | e_gw1.05.1050.1 | -                                                                     |                                            |
| 17  | -138.41  | e_gw1.05.1364.1 | -                                                                     |                                            |
| 18  | -5.778   | e_gw1.05.468.1  | RIO kinase                                                            | Cell cycle control                         |
| 19  | -24.721  | e_gw1.06.288.1  | Transposase family, tnp2                                              | transposition                              |
| 20  | -4.226   | e_gw1.06.444.1  | -                                                                     |                                            |
| 21  | -174.28  | e_gw1.06.934.1  | -                                                                     |                                            |
| 22  | -6.352   | e_gw1.07.1172.1 | COG (conserved oligomeric Golgi) complex component, COG2              | Golgi function                             |
| 23  | -15.93   | e_gw1.07.1431.1 | -                                                                     |                                            |
| 24  | -11.308  | e_gw1.07.1957.1 | glycoside hydrolase family 115 protein                                | Carbohydrate metabolism                    |
| 25  | -5.555   | e_gw1.07.710.1  | STE family Protein Kinases                                            | Signal                                     |

|    |          |                            |                                                     |                                                                            |
|----|----------|----------------------------|-----------------------------------------------------|----------------------------------------------------------------------------|
|    |          |                            |                                                     | transduction                                                               |
| 26 | -8.174   | e_gw1.08.2112.1            | alpha-1,6-mannanase                                 | Carbohydrate metabolism, (Yeast cell wall degradation)                     |
| 27 | -5.201   | e_gw1.08.2119.1            | -                                                   |                                                                            |
| 28 | -171.572 | e_gw1.09.1714.1            | -                                                   |                                                                            |
| 29 | -7.149   | e_gw1.09.1784.1            | Rad52/22                                            | DNA damage                                                                 |
| 30 | -10.684  | e_gw1.09.399.1             | -                                                   |                                                                            |
| 31 | -4.468   | e_gw1.09.916.1             | -                                                   |                                                                            |
| 32 | -4.669   | e_gw1.10.340.1             | -                                                   |                                                                            |
| 33 | -9.325   | e_gw1.10.538.1             | -                                                   |                                                                            |
| 34 | -8.894   | e_gw1.11.905.1             | HNH endonuclease                                    | Transposition                                                              |
| 35 | -5.219   | e_gw1.12.1238.1            | Snurportin-1                                        | Spliceosome function                                                       |
| 36 | -4.578   | e_gw1.12.1332.1            | Deoxycytidylate deaminase                           | Nucleotide metabolism, Thymidine synthesis (DNA damage)                    |
| 37 | -6.245   | e_gw1.13.1133.1            | betaine-aldehyde dehydrogenase                      | Energy production (mitochondria), Glycine, serine and threonine metabolism |
| 38 | -7.37    | e_gw1.13.1363.1            | CAMK/CAMKL/CHK1 protein kinase                      | Cell cycle control                                                         |
| 39 | -514.798 | e_gw1.13.470.1             | -                                                   |                                                                            |
| 40 | -5.513   | e_gw1.14.1005.1            | -                                                   |                                                                            |
| 41 | -6.464   | e_gw1.14.70.1              | -                                                   |                                                                            |
| 42 | -23.035  | estExt_fgenes1_kg.C_020188 | Protein Kinase                                      | Signal transduction                                                        |
| 43 | -9.793   | estExt_fgenes1_kg.C_020422 | S-adenosyl-L-methionine-dependent methyltransferase | Energy production, Biosynthesis of menaquinone and ubiquinone              |
| 44 | -5.06    | estExt_fgenes1_kg.C_040370 | -                                                   |                                                                            |
| 45 | -4.131   | estExt_fgenes1_kg.C_050016 | Fibrin                                              | Chaperone                                                                  |
| 46 | -33.937  | estExt_fgenes1_kg.C_050098 | -                                                   |                                                                            |
| 47 | -19.427  | estExt_fgenes1_kg.C_050342 | -                                                   |                                                                            |
| 48 | -17.421  | estExt_fgenes1_kg.C_050343 | -                                                   |                                                                            |
| 49 | -14.596  | estExt_fgenes1_kg.C_060355 | -                                                   |                                                                            |
| 50 | -4.444   | estExt_fgenes1_kg.C_060407 | -                                                   |                                                                            |
| 51 | -15.918  | estExt_fgenes1_kg.C_070076 | -                                                   |                                                                            |
| 52 | -4.458   | estExt_fgenes1_kg.C_070174 | SUR7                                                | Endocytosis, sporulation                                                   |
| 53 | -6.691   | estExt_fgenes1_kg.C_090182 | Cwf15/Cwc15                                         | Spliceosome function                                                       |
| 54 | -17.984  | estExt_fgenes1_kg.C_100045 | linoleoyl phosphatidylcholine delta-12 acetylenase  | Lipid metabolism                                                           |
| 55 | -6.241   | estExt_fgenes1_kg.C_100047 | delta-12 fatty acid desaturase                      | Lipid metabolism                                                           |
| 56 | -8.342   | estExt_fgenes1_kg.C_120124 | delta-12 fatty acid desaturase                      | Lipid metabolism, cell membrane fluidity                                   |
| 57 | -4.36    | estExt_fgenes1_kg.C_120132 | -                                                   |                                                                            |
| 58 | -4.93    | estExt_fgenes1_kg.C_130076 | -                                                   |                                                                            |

|    |         |                             |                                                             |                                                                     |
|----|---------|-----------------------------|-------------------------------------------------------------|---------------------------------------------------------------------|
| 59 | -4.022  | estExt_fgenesh1_kg.C_130077 | -                                                           |                                                                     |
| 60 | -7.035  | estExt_fgenesh1_kg.C_130079 | Ankyrin repeat protein                                      | Cell membrane                                                       |
| 61 | -4.861  | estExt_fgenesh1_kg.C_130126 | -                                                           |                                                                     |
| 62 | -9.827  | estExt_fgenesh1_pg.C_040006 | -                                                           |                                                                     |
| 63 | -64.969 | estExt_fgenesh1_pg.C_050529 | -                                                           |                                                                     |
| 64 | -10.07  | estExt_fgenesh1_pg.C_090253 | -                                                           |                                                                     |
| 65 | -4.213  | estExt_fgenesh1_pg.C_110050 | -                                                           |                                                                     |
| 66 | -16.866 | estExt_fgenesh1_pg.C_110256 | -                                                           |                                                                     |
| 67 | -7.698  | estExt_fgenesh1_pg.C_140200 | -                                                           |                                                                     |
| 68 | -8.48   | estExt_fgenesh1_pm.C_010707 | polysaccharide lyase family 8                               | Carbohydrate metabolism                                             |
| 69 | -4.982  | estExt_fgenesh1_pm.C_020300 | -                                                           |                                                                     |
| 70 | -4.289  | estExt_fgenesh1_pm.C_020325 | -                                                           |                                                                     |
| 71 | -15.52  | estExt_fgenesh1_pm.C_040243 | Protein Serine/Threonine Kinase                             | Signal transduction                                                 |
| 72 | -6.317  | estExt_fgenesh1_pm.C_060082 | phosphatidylinositol-specific phospholipase                 | Lipid membrane (carbon and phosphate metabolism, second messengers) |
| 73 | -52.2   | estExt_fgenesh1_pm.C_060196 | -                                                           | chaperone                                                           |
| 74 | -4.404  | estExt_fgenesh1_pm.C_060628 | -                                                           |                                                                     |
| 75 | -9.603  | estExt_fgenesh1_pm.C_140068 | smc-domain containing protein                               | Cell division / Chromosome-associated                               |
| 76 | -5.176  | estExt_Genemark.C_010128    | importin 9                                                  | Nuclear transport                                                   |
| 77 | -32.819 | estExt_Genemark.C_010152    | -                                                           |                                                                     |
| 78 | -7.017  | estExt_Genemark.C_020627    | -                                                           |                                                                     |
| 79 | -5.217  | estExt_Genemark.C_030505    | Shwachman-Bodian-Diamond containing protein                 | Ribosome 60S maturation                                             |
| 80 | -9.774  | estExt_Genemark.C_030681    | Cytochrome P450                                             | Oxidative degradation                                               |
| 81 | -15.79  | estExt_Genemark.C_030874    | -                                                           |                                                                     |
| 82 | -64.62  | estExt_Genemark.C_040367    | -                                                           |                                                                     |
| 83 | -12.886 | estExt_Genemark.C_050519    | serine- threonine-rich membrane-anchored protein            | Cell wall organisation /fruiting body                               |
| 84 | -28.202 | estExt_Genemark.C_050782    | -                                                           |                                                                     |
| 85 | -8.8    | estExt_Genemark.C_060269    | -                                                           |                                                                     |
| 86 | -13.508 | estExt_Genemark.C_080422    | g2/mitotic-specific cyclin cdc13                            | Cell cycle control                                                  |
| 87 | -4.361  | estExt_Genemark.C_090019    | Flotillin                                                   | Cell membrane functions (membrane microdomains ie. scaffold)        |
| 88 | -12.598 | estExt_Genemark.C_090496    | -                                                           |                                                                     |
| 89 | -8.626  | estExt_Genemark.C_090563    | -                                                           |                                                                     |
| 90 | -9.702  | estExt_Genemark.C_100076    | Esterase/lipase                                             | Lipid metabolism                                                    |
| 91 | -5.731  | estExt_Genemark.C_120151    | NADP+-dependent D-mannitol dehydrogenase                    | Carbohydrate metabolism, mannitol cycle?                            |
| 92 | -76.159 | estExt_Genemark.C_120348    | galactose mutarotase                                        | Carbohydrate metabolism, Leloir pathway?                            |
| 93 | -10.477 | estExt_Genemark.C_120361    | -                                                           |                                                                     |
| 94 | -5.869  | estExt_Genewise1.C_010098   | Predicted flavoprotein involved in K <sup>+</sup> transport | Inorganic ion transport                                             |
| 95 | -7.556  | estExt_Genewise1.C_010405   | -                                                           |                                                                     |

|     |         |                                                                   |                                               |                                                        |
|-----|---------|-------------------------------------------------------------------|-----------------------------------------------|--------------------------------------------------------|
| 96  | -7.607  | estExt_Genewise1.C_022666                                         | -                                             |                                                        |
| 97  | -9.123  | estExt_Genewise1.C_032716                                         | -                                             |                                                        |
| 98  | -57.427 | estExt_Genewise1.C_032736                                         | -                                             |                                                        |
| 99  | -7.366  | estExt_Genewise1.C_040784                                         | Cyanase                                       | N-metabolism                                           |
| 100 | -14.339 | estExt_Genewise1.C_041543                                         | Tyrosine protein kinase                       | Signal transduction                                    |
| 101 | -4.046  | estExt_Genewise1.C_050271                                         | maintenance of ploidy protein, mob2           | Cell cycle control                                     |
| 102 | -4.136  | estExt_Genewise1.C_051727                                         | dephospho-CoA kinase                          | Energy production, Lipid metabolism, Citric acid cycle |
| 103 | -4.631  | estExt_Genewise1.C_090061                                         | -                                             |                                                        |
| 104 | -12.161 | estExt_Genewise1.C_090192                                         | -                                             |                                                        |
| 105 | -10.424 | estExt_Genewise1.C_090718                                         | Pyridine nucleotide-disulphide oxidoreductase | Oxidation-reduction process                            |
| 106 | -12.775 | estExt_Genewise1.C_111398                                         | RNA polymerase III                            | Non-translated RNA synthesis                           |
| 107 | -27.82  | estExt_Genewise1.C_120772                                         | -                                             |                                                        |
| 108 | -16.021 | estExt_Genewise1Plus.C_011290                                     | -                                             |                                                        |
| 109 | -17.214 | estExt_Genewise1Plus.C_020036                                     | Protein kinase                                | Signal transduction                                    |
| 110 | -6.195  | estExt_Genewise1Plus.C_032683                                     | -                                             |                                                        |
| 111 | -8.842  | estExt_Genewise1Plus.C_042002                                     |                                               |                                                        |
| 112 | -31.486 | estExt_Genewise1Plus.C_050332                                     |                                               |                                                        |
| 113 | -7.175  | estExt_Genewise1Plus.C_051139                                     | Old yellow enzyme                             | Oxidation-reduction process, oxidative stress          |
| 114 | -10.579 | estExt_Genewise1Plus.C_070930                                     | -                                             |                                                        |
| 115 | -9.955  | estExt_Genewise1Plus.C_071477                                     | -                                             |                                                        |
| 116 | -6.078  | estExt_Genewise1Plus.C_080388                                     | -                                             |                                                        |
| 117 | -5.248  | estExt_Genewise1Plus.C_090364                                     | -                                             |                                                        |
| 118 | -13.191 | estExt_Genewise1Plus.C_091304                                     | -                                             | RNA binding                                            |
| 119 | -18.594 | estExt_Genewise1Plus.C_110726                                     | -                                             |                                                        |
| 120 | -27.866 | estExt_Genewise1Plus.C_130454                                     | -                                             |                                                        |
| 121 | -6.191  | estExt_Genewise1Plus.C_130816                                     | -                                             |                                                        |
| 122 | -5.682  | fgenes1_kg.01_#_141_#_1529_1_CCOZ_CCPA_CCPB_CCPC_EXT_A            | -                                             |                                                        |
| 123 | -20.446 | fgenes1_kg.01_#_29_#_4383_0_CCOZ3613.b1_CCOZ_CCPA_CCPB_CCPC_EXT_A | -                                             |                                                        |
| 124 | -5.249  | fgenes1_kg.01_#_430_#_1038_1_CCOZ_CCPA_CCPB_CCPC_EXT_A            | expansin family protein                       | Cell wall organisation or pathogenesis?                |
| 125 | -6.115  | fgenes1_kg.01_#_554_#_0_0_A710D1_CCOZ_CCPA_CCPB_CCPC_EXT_A        | -                                             |                                                        |
| 126 | -5.77   | fgenes1_kg.02_#_13_#_3656_0_CCOZ3079.b1_CCOZ_CCPA_CCPB_CCPC_EXT_A | -                                             |                                                        |
| 127 | -8.63   | fgenes1_kg.02_#_41_#_2763_1_CCOZ_CCPA_CCPB_CCPC_EXT_A             | -                                             |                                                        |
| 128 | -10.179 | fgenes1_kg.03_#_323_#_776_1_CCOZ_CCPA_CCPB_CCPC_EXT_A             | -                                             |                                                        |
| 128 | -34.857 | fgenes1_kg.05_#_100_#_4987_0_CCPB659.g1_CCOZ_CCPA_CCPB_CCPC_EXT_A | -                                             |                                                        |
| 130 | -6.497  | fgenes1_kg.05_#_517_#_0_0_CCPB3358.b1_CCOZ_CCPA_CCPB_CCPC_EXT_A   | GCN5-related N-acetyltransferase              | Acetyl Coenzyme acetyltransferase                      |
| 131 | -16.388 | fgenes1_kg.06_#_248_#_1288_1_CCOZ_CCPA_CCPB_CCPC_EXT_A            | Haloacid dehalogenase-like hydrolases         | Phosphoryl transfer reaction                           |

|     |          |                                                                   |                                                          |                                                       |
|-----|----------|-------------------------------------------------------------------|----------------------------------------------------------|-------------------------------------------------------|
| 132 | -5.72    | fgenes1_kg.09_#_300_#_144896                                      | Cytochrome P450 monooxygenase 97                         | Oxidative degradation                                 |
| 133 | -7.319   | fgenes1_kg.11_#_193_#_1582_1_CCOZ_CCPA_CCPB_CCPC_EXT_A            | -                                                        |                                                       |
| 134 | -11.838  | fgenes1_kg.11_#_89_#_1931_1_CCOZ_CCPA_CCPB_CCPC_EXT_A             | serine- threonine-rich membrane-anchored protein         | Cell wall organisation                                |
| 135 | -7.101   | fgenes1_kg.12_#_200_#_214_0_CCPC7322.g1_CCOZ_CCPA_CCPB_CCPC_EXT_A | -                                                        |                                                       |
| 136 | -191.707 | fgenes1_pg.01_#_57                                                | N-acetylmuramoyl-L-alanine amidase                       | Cell wall organisation                                |
| 137 | -25.44   | fgenes1_pg.02_#_128                                               | -                                                        |                                                       |
| 138 | -25.635  | fgenes1_pg.02_#_49                                                | -                                                        |                                                       |
| 139 | -5.967   | fgenes1_pg.03_#_407                                               | PaaI_thioesterase-like protein                           | Aromatic compounds catabolism                         |
| 140 | -9.357   | fgenes1_pg.03_#_710                                               | -                                                        |                                                       |
| 141 | -4.415   | fgenes1_pg.04_#_163                                               | -                                                        |                                                       |
| 142 | -4.492   | fgenes1_pg.04_#_178                                               | Protein Serine/Threonine Kinase                          | Signal transduction                                   |
| 143 | -4.327   | fgenes1_pg.04_#_396                                               | Vta1 like                                                | Endosome function                                     |
| 144 | -110.09  | fgenes1_pg.05_#_548                                               | -                                                        |                                                       |
| 145 | -17.798  | fgenes1_pg.06_#_23                                                | -                                                        |                                                       |
| 146 | -138.59  | fgenes1_pg.07_#_77                                                | -                                                        |                                                       |
| 147 | -8.374   | fgenes1_pg.08_#_277                                               | -                                                        |                                                       |
| 148 | -6.048   | fgenes1_pg.11_#_150                                               | NEK protein kinase                                       | Cell cycle control                                    |
| 149 | -4.951   | fgenes1_pg.12_#_109                                               | -                                                        |                                                       |
| 150 | -6.344   | fgenes1_pg.12_#_119                                               | E3 ubiquitin ligase                                      | Protein degradation                                   |
| 151 | -42.204  | fgenes1_pg.12_#_301                                               | Vta1 like                                                | Endosome function                                     |
| 152 | -5.692   | fgenes1_pg.13_#_75                                                | E3 ubiquitin ligase                                      | Protein degradation                                   |
| 153 | -4.467   | fgenes1_pg.14_#_41                                                | -                                                        |                                                       |
| 154 | -4.023   | fgenes1_pm.01_#_143                                               | -                                                        |                                                       |
| 155 | -4.364   | fgenes1_pm.01_#_270                                               | Ngg1-interacting factor 3 protein NIF3L1                 | Transcription                                         |
| 156 | -4.174   | fgenes1_pm.02_#_1070                                              | Proteophosphoglycan                                      | Cell wall organisation                                |
| 157 | -24.589  | fgenes1_pm.02_#_71                                                | Transposase family tnp2                                  | Transposition                                         |
| 158 | -4.009   | fgenes1_pm.03_#_698                                               | -                                                        |                                                       |
| 159 | -9.78    | fgenes1_pm.04_#_264                                               | Lipase/esterase                                          | Lipid metabolism                                      |
| 160 | -10.146  | fgenes1_pm.05_#_54                                                | -                                                        |                                                       |
| 161 | -26.834  | fgenes1_pm.05_#_593                                               | G protein-coupled glucose receptor regulating Gpa2 ;Git3 | Carbohydrate metabolism, adenylate cyclase activation |
| 162 | -7.844   | fgenes1_pm.06_#_17                                                | -                                                        |                                                       |
| 163 | -5.89    | fgenes1_pm.06_#_393                                               | Osmotically inducible protein C (OsmC)                   | Oxidative stress                                      |
| 164 | -7.359   | fgenes1_pm.08_#_105                                               | Serine/threonine protein kinase                          | Signal transduction                                   |
| 165 | -13.959  | fgenes1_pm.08_#_201                                               | -                                                        |                                                       |
| 166 | -6.715   | fgenes1_pm.08_#_409                                               | Major royal jelly protein/ apalbumin                     | -                                                     |
| 167 | -4.386   | fgenes1_pm.08_#_597                                               | -                                                        |                                                       |
| 168 | -21.932  | fgenes1_pm.09_#_234                                               | Cupredoxin-like                                          | Electron transfer                                     |
| 169 | -4.285   | fgenes1_pm.09_#_449                                               | Cytochrome P450                                          | Oxidative degradation                                 |

|     |          |                       |                                                                        |                                                                        |
|-----|----------|-----------------------|------------------------------------------------------------------------|------------------------------------------------------------------------|
| 170 | -4.906   | fgenesH1_pm.10_#_428  | -                                                                      |                                                                        |
| 171 | -10.862  | Genemark.1061_g       | -                                                                      |                                                                        |
| 172 | -4.288   | Genemark.1110_g       | Inner centromere protein (INCENP)                                      | Cell cycle control                                                     |
| 173 | -4.988   | Genemark.1341_g       | P-loop containing nucleoside triphosphate hydrolase protein            | Energy production<br>Protein conformation                              |
| 174 | -19.139  | Genemark.1879_g       | -                                                                      |                                                                        |
| 175 | -4.364   | Genemark.2438_g       | Fumarylacetoacetate (FAA) hydrolase                                    | Energy production,<br>Citric acid cycle,<br>Tyrosine catabolic pathway |
| 176 | -21.935  | Genemark.2646_g       | -                                                                      |                                                                        |
| 177 | -257.534 | Genemark.2840_g       | -                                                                      |                                                                        |
| 178 | -41.703  | Genemark.306_g        | Double-stranded RNA binding motif protein                              | Unspecific dsRNA binding                                               |
| 179 | -57.071  | Genemark.3463_g       | protein kinase                                                         | Signal transduction                                                    |
| 180 | -15.319  | Genemark.3618_g       | -                                                                      |                                                                        |
| 181 | -14.239  | Genemark.4960_g       | -                                                                      |                                                                        |
| 182 | -7.817   | Genemark.5694_g       | ribosomal-protein-alanine acetyltransferase                            | Translation                                                            |
| 183 | -11.55   | Genemark.5920_g       | Peptidase separin                                                      | Protein degradation<br>Cell cycle control                              |
| 184 | -36.6    | Genemark.7118_g       | -                                                                      |                                                                        |
| 185 | -4.526   | Genemark.7491_g       | Protein Kinase                                                         | Signal transduction                                                    |
| 186 | -5.226   | gw1.01.2714.1         | Protein Serine/Threonine Kinase cell division-related protein kinase 2 | Signal transduction,<br>Cell cycle control                             |
| 187 | -5.912   | gw1.01.3727.1         | Protein Kinase                                                         | Signal transduction                                                    |
| 188 | -4.797   | gw1.02.2324.1         | set and mynd domain-containing protein 3                               | Transcription                                                          |
| 189 | -6.462   | gw1.02.3427.1         | Thioesterase/thiol ester dehydrase-isomerase                           | Lipid metabolism                                                       |
| 190 | -12.268  | gw1.08.1240.1         | -                                                                      |                                                                        |
| 191 | -50.572  | gw1.09.775.1          | -                                                                      | DNA binding,<br>Transcription                                          |
| 192 | -8.278   | gw1.12.1443.1         | HSP20-like chaperone                                                   | chaperon                                                               |
| 193 | -5.907   | gw1.13.549.1          | -                                                                      |                                                                        |
| 194 | -5.619   | gw1.14.1148.1         | -                                                                      |                                                                        |
| 195 | -113.379 | gw1.14.918.1          | -                                                                      |                                                                        |
| 196 | -16.428  | Hetan1.e_gw1.1.404.1  | E3 ubiquitin ligase                                                    | Protein degradation                                                    |
| 197 | -7.036   | Hetan1.e_gw1.14.656.1 | Sirtuin 5                                                              | Transcription                                                          |
| 198 | -6.042   | Hetan1.e_gw1.18.41.1  | Clavaminic synthase-like protein                                       | Citric acid cycle                                                      |
| 199 | -4.338   | Hetan1.e_gw1.2.201.1  | serine protease S53                                                    | Protein degradation                                                    |

|     |          |                                    |                                                                      |                                                                                   |
|-----|----------|------------------------------------|----------------------------------------------------------------------|-----------------------------------------------------------------------------------|
| 200 | -4.467   | Hetan1.e_gw1.4.1655.1              | mitochondrial carrier protein                                        | Energy production                                                                 |
| 201 | -4.417   | Hetan1.e_gw1.4.286.1               | Six-hairpin glycosidase-like                                         | Carbohydrate metabolism                                                           |
| 202 | -5.558   | Hetan1.e_gw1.4.316.1               | tartrate transporter                                                 | Carbohydrate metabolism                                                           |
| 203 | -5.804   | Hetan1.e_gw1.5.100.1               | glucose-methanol-choline oxidoreductase family. GMC oxidoreductase 7 | Reduction process, Glycine, serine and threonine metabolism                       |
| 204 | -5.434   | Hetan1.e_gw1.5.75.1                | mfs monosaccharide                                                   | Carbohydrate metabolism                                                           |
| 205 | -18.244  | Hetan1.e_gw1.6.1498.1              | -                                                                    |                                                                                   |
| 206 | -6.194   | Hetan1.e_gw1.7.180.1               | lycoside Hydrolase Family 79 protein b-glucuronidase                 | Carbohydrate metabolism                                                           |
| 207 | -6.696   | Hetan1.e_gw1.7.656.1               | C6 zinc binuclear cluster DNA-binding domain protein                 | Transcription                                                                     |
| 208 | -38.103  | Hetan1.e_gw1.8.123.1               | beta-glucosidase                                                     | Carbohydrate metabolism, Cellulose degradation                                    |
| 209 | -9.965   | Hetan1.e_gw1.8.20.1                | vegetative incompatibility protein HET-E-1                           | Vegetative incompatibility                                                        |
| 210 | -9.991   | Hetan1.e_gw1.9.122.1               | murein transglycosylase                                              | Cell wall organisation                                                            |
| 211 | -11.06   | Hetan1.e_gw1.9.93.1                | tartrate transporter                                                 | Carbohydrate metabolism                                                           |
| 212 | -13.518  | Hetan1.estExt_fgenesh2_pg.C_100028 | Choline dehydrogenase 3                                              | Reduction process, Glycine, serine and threonine metabolism                       |
| 213 | -19.212  | Hetan1.estExt_fgenesh2_pg.C_170070 | mannan endo-1,4-beta-mannosidase                                     | Carbohydrate metabolism, mannitol cycle?                                          |
| 214 | -5.448   | Hetan1.estExt_fgenesh2_pm.C_100163 | MFS general substrate transporter                                    | Cell transport                                                                    |
| 215 | -155.097 | Hetan1.estExt_fgenesh2_pm.C_10627  | Oligoxyloglucan reducing end-specific cellobiohydrolase              | Carbohydrate metabolism, Cellulose degradation                                    |
| 216 | -4.227   | Hetan1.estExt_fgenesh2_pm.C_110093 | Transketolase                                                        | Energy production, Carbohydrate metabolism, Glycolysis, Pentose phosphate pathway |
| 217 | -4.18    | Hetan1.estExt_fgenesh2_pm.C_140112 | -                                                                    |                                                                                   |
| 218 | -6.798   | Hetan1.estExt_fgenesh2_pm.C_30354  | amidohydrolase                                                       | Metal-dependent hydrolase                                                         |
| 219 | -7.557   | Hetan1.estExt_fgenesh2_pm.C_60162  | mitochondrial chaperone bcs1                                         | Chaperone, Energy production                                                      |
| 220 | -5.934   | Hetan1.estExt_fgenesh2_pm.C_80170  | Serine/threonine protein kinase                                      | Signal transduction                                                               |



|     |          |                                      |                                                                          |                                                              |
|-----|----------|--------------------------------------|--------------------------------------------------------------------------|--------------------------------------------------------------|
| 221 | -19.187  | Hetan1.estExt_fgenesh2_pm.C_90173    | Piwi-like protein                                                        | RNA related                                                  |
| 222 | -8.118   | Hetan1.estExt_fgenesh2_pm.C_90257    |                                                                          |                                                              |
| 223 | -53.985  | Hetan1.estExt_fgenesh3_kg.C_110095   | Aegerolysin-like protein                                                 | Fruiting body                                                |
| 224 | -7.218   | Hetan1.estExt_fgenesh3_kg.C_130051   | Monocarboxylate transporter                                              | Carbohydrate metabolism                                      |
| 225 | -4.296   | Hetan1.estExt_fgenesh3_kg.C_130113   | -                                                                        |                                                              |
| 226 | -238.507 | Hetan1.estExt_fgenesh3_kg.C_140135   | prolyl aminopeptidase                                                    | Protein degradation, citric acid cycle?                      |
| 227 | -4.687   | Hetan1.estExt_fgenesh3_kg.C_30057    | 1,3(4)-beta-D-glucanases                                                 | Carbohydrate metabolism                                      |
| 228 | -4.004   | Hetan1.estExt_fgenesh3_kg.C_40133    | ]. 5-methyltetrahydropteroyltriglutamate--homocysteine methyltransferase | Amino acid metabolism, Methionin synthesis                   |
| 229 | -53.453  | Hetan1.estExt_fgenesh3_kg.C_90130    | hydrophobin 2 HAH                                                        | Cell wall organisation, conidia                              |
| 230 | -612.846 | Hetan1.estExt_Genewise1.C_110899     | [reducing end-acting] cellobiohydrolase                                  | Carbohydrate metabolism, cellulose degradation, Pathogenesis |
| 231 | -67.691  | Hetan1.estExt_Genewise1.C_140270     | OAH1, oxaloacetate acetylhydrolase                                       | Pathogenesis?                                                |
| 232 | -10      | Hetan1.estExt_Genewise1.C_41982      | MFS monocarboxylate transporter<br>Fucose or D-galactonate?              | carbohydrate metabolism                                      |
| 233 | -4.914   | Hetan1.estExt_Genewise1.C_70859      | -                                                                        |                                                              |
| 234 | -7.318   | Hetan1.estExt_Genewise1.C_80386      | clp1                                                                     | Transcription, Sex                                           |
| 235 | -7.123   | Hetan1.estExt_Genewise1Plus.C_120793 | serine protease S53 Grifolin                                             | Fruiting bodies                                              |
| 236 | -11.438  | Hetan1.estExt_Genewise1Plus.C_130206 | aryl-alcohol oxidase 11, aao11 (GMC oxidoreductase family)               | Aromatic compounds catabolism                                |
| 237 | -4.064   | Hetan1.estExt_Genewise1Plus.C_140577 | cysteine desulfurase Molybdenum cofactor sulfurase                       | Nitrogen fixation                                            |
| 238 | -239.723 | Hetan1.estExt_Genewise1Plus.C_20287  | cellulase CEL6B                                                          | Carbohydrate metabolism, cellulose degradation Pathogenesis  |
| 239 | -4.126   | Hetan1.estExt_Genewise1Plus.C_20298  | Carboxylesterase                                                         | Lipid metabolism, Aromatic compounds catabolism              |
| 240 | -5.102   | Hetan1.estExt_Genewise1Plus.C_20997  | -                                                                        | transcription                                                |
| 241 | -11.565  | Hetan1.estExt_Genewise1Plus.C_21347  | beta-glucosidase from glycoside hydrolase family GH3                     | Carbohydrate metabolism, cellulose degradation, Pathogenesis |
| 242 | -16.917  | Hetan1.estExt_Genewise1Plus.C_30014  | -                                                                        |                                                              |
| 243 | -516.44  | Hetan1.estExt_Genewise1Plus.C_30112  | carotenoid ester lipase                                                  | Lipid                                                        |

|     |          |                                     |                                               |                                                                        |
|-----|----------|-------------------------------------|-----------------------------------------------|------------------------------------------------------------------------|
|     |          |                                     | precursor                                     | metabolism,<br>Aromatic<br>compounds<br>catabolism                     |
| 244 | -117.021 | Hetan1.estExt_Genewise1Plus.C_31603 | CEL4b mannanase                               | Carbohydrate<br>metabolism,<br>mannitol cycle?                         |
| 245 | -13.215  | Hetan1.estExt_Genewise1Plus.C_41986 | Choline dehydrogenase 6,<br>chd6              | Reduction<br>process<br>Glycine, serine<br>and threonine<br>metabolism |
| 246 | -7.121   | Hetan1.estExt_Genewise1Plus.C_50658 | glucan endo-1,3-beta-D-<br>glucosidase        | Cell wall<br>organisation,<br>carbohydrate<br>metabolism               |
| 247 | -7.965   | Hetan1.estExt_Genewise1Plus.C_70854 | cytochrome P450<br>monooxygenase 12,<br>cyp12 | Oxidative<br>degradation                                               |
| 248 | -538.916 | Hetan1.estExt_Genewise1Plus.C_70955 | cytochrome P450<br>monooxygenase 8<br>cyp8    | Oxidative<br>degradation                                               |
| 249 | -21.521  | Hetan1.estExt_Genewise1Plus.C_90100 | Alpha-amylase                                 | Carbohydrate<br>metabolism,<br>Starch, glycogen                        |
| 250 | -8.27    | Hetan1.estExt_Genewise1Plus.C_90792 | aryl-alcohol oxidase-like<br>protein          | Aromatic<br>compounds<br>catabolism                                    |
| 251 | -14.617  | Hetan1.EuGene10000524               | high affinity methionine<br>permease          | Amino acid<br>metabolism                                               |
| 252 | -650.372 | Hetan1.EuGene1000637                | B2 mating type protein                        | Sex,<br>pathogenesis                                                   |
| 253 | -10.818  | Hetan1.EuGene1001300                | -                                             |                                                                        |
| 254 | -4.454   | Hetan1.EuGene12000113               | Lipid-translocating Exporter                  | Lipid metabolism                                                       |
| 255 | -5.805   | Hetan1.EuGene12000379               | -                                             |                                                                        |
| 256 | -140.42  | Hetan1.EuGene14000316               | expansin-like protein                         | Cell wall<br>organisation or<br>pathogenesis?                          |
| 257 | -21.51   | Hetan1.EuGene3000933                | -                                             |                                                                        |
| 258 | -8.892   | Hetan1.EuGene4000483                | Cytochrome P450<br>monooxygenase 86, cpm86    |                                                                        |
| 259 | -13.264  | Hetan1.EuGene4000639                | zfp5                                          | Transcription                                                          |
| 260 | -5.014   | Hetan1.EuGene4000651                | -                                             |                                                                        |
| 261 | -5.195   | Hetan1.EuGene4000673                | -                                             |                                                                        |
| 262 | -6.978   | Hetan1.EuGene4001280                | -                                             |                                                                        |
| 263 | -11.868  | Hetan1.EuGene5000221                | Heterokaryon incompatibility<br>protein       | Sex                                                                    |
| 264 | -28.08   | Hetan1.EuGene5000627                | cytochrome P450<br>monooxygenase 33,<br>cyp33 |                                                                        |
| 265 | -11.32   | Hetan1.EuGene7000238                | DNA repair metallo-beta-<br>lactamase         | DNA damage                                                             |
| 266 | -22.495  | Hetan1.EuGene7000331                | MFS sugar transporter                         | Carbohydrate<br>metabolism                                             |
| 267 | -5.095   | Hetan1.EuGene8000624                | -                                             |                                                                        |

|     |         |                                                                |                                                               |                                                                                   |
|-----|---------|----------------------------------------------------------------|---------------------------------------------------------------|-----------------------------------------------------------------------------------|
| 268 | -85.737 | Hetan1.EuGene9000498                                           | Peptidase separin                                             | Protein degradation, cell cycle control                                           |
| 269 | -24.008 | Hetan1.EuGene9000612                                           | GMC oxidoreductase 11, gor11                                  | Reduction process                                                                 |
| 270 | -4.819  | Hetan1.fgenesh2_pg.C_scaffold_10000052                         | -                                                             |                                                                                   |
| 271 | -36.422 | Hetan1.fgenesh2_pg.C_scaffold_1000073                          | -                                                             |                                                                                   |
| 272 | -4.401  | Hetan1.fgenesh2_pg.C_scaffold_1000112                          | -                                                             |                                                                                   |
| 273 | -5.118  | Hetan1.fgenesh2_pg.C_scaffold_1000570                          | -                                                             |                                                                                   |
| 274 | -4.077  | Hetan1.fgenesh2_pg.C_scaffold_13000220                         | d-4,5 unsaturated-glucuronyl hydrolase-like protein           | Carbohydrate metabolism, pectin degradation                                       |
| 275 | -6.442  | Hetan1.fgenesh2_pg.C_scaffold_14000198                         | -                                                             |                                                                                   |
| 276 | -4.12   | Hetan1.fgenesh2_pg.C_scaffold_15000146                         | Mitogen-activated protein kinase kinase kinase kinase (MAP4K) | Signal transduction                                                               |
| 277 | -9.345  | Hetan1.fgenesh2_pg.C_scaffold_16000041                         | -                                                             |                                                                                   |
| 278 | -8.847  | Hetan1.fgenesh2_pg.C_scaffold_18000039                         | -                                                             | Transcription                                                                     |
| 279 | -8.585  | Hetan1.fgenesh2_pg.C_scaffold_2000301                          | Carbohydrate Esterase Family 16 protein                       | Lipid metabolism                                                                  |
| 280 | -62.583 | Hetan1.fgenesh2_pg.C_scaffold_3000085                          | mediator of replication checkpoint protein 1                  | Cell cycle control                                                                |
| 281 | -9.807  | Hetan1.fgenesh2_pg.C_scaffold_4000481                          | -                                                             |                                                                                   |
| 282 | -12.484 | Hetan1.fgenesh2_pg.C_scaffold_7000396                          | -                                                             |                                                                                   |
| 283 | -4.696  | Hetan1.fgenesh2_pm.C_scaffold_12000112                         | N-acetylglucosaminyl phosphatidylinositol de-N-acetylase      | Cell membrane, Cell wall                                                          |
| 284 | -32.664 | Hetan1.fgenesh2_pm.C_scaffold_12000213                         | hexose transporter                                            | Carbohydrate metabolism                                                           |
| 285 | -6.244  | Hetan1.fgenesh2_pm.C_scaffold_13000200                         | cation binding protein                                        |                                                                                   |
| 286 | -4.759  | Hetan1.fgenesh2_pm.C_scaffold_4000072                          | b-glucosidase, Glycoside Hydrolase Family 3 protein           | Carbohydrate metabolism, cellulose degradation                                    |
| 287 | -31.182 | Hetan1.fgenesh2_pm.C_scaffold_4000773                          | cep3 - cellulose expressed protein 3, cep3                    | Carbohydrate metabolism, cellulose degradation                                    |
| 288 | -35.332 | Hetan1.fgenesh2_pm.C_scaffold_5000208                          | Cytochrome P450 CYP2 subfamily cyp61                          |                                                                                   |
| 289 | -5.046  | Hetan1.fgenesh2_pm.C_scaffold_8000058                          | Sirtuin 5                                                     | Transcription, sex                                                                |
| 290 | -4.28   | Hetan1.fgenesh3_kg.2_#_382_#_4800_1_C COZ_CCPA_CCPB_CCPC_EXT_A | -                                                             |                                                                                   |
| 291 | -11.868 | Hetan1.Genemark.10294_g                                        | beta-mannosidase                                              | Carbohydrate metabolism, hemicelluloses/ga lactomannan degradation mannitol cycle |
| 292 | -6.118  | Hetan1.Genemark.10427_g                                        | -                                                             |                                                                                   |
| 293 | -5.199  | Hetan1.Genemark.1565_g                                         | -                                                             |                                                                                   |
| 294 | -6.802  | Hetan1.Genemark.1909_g                                         | -                                                             |                                                                                   |
| 295 | -11.457 | Hetan1.Genemark.2406_g                                         | -                                                             |                                                                                   |

|     |          |                        |                                                             |                                                |
|-----|----------|------------------------|-------------------------------------------------------------|------------------------------------------------|
| 296 | -9.16    | Hetan1.Genemark.2891_g | -                                                           |                                                |
| 297 | -5.013   | Hetan1.Genemark.3213_g | -                                                           |                                                |
| 298 | -5.416   | Hetan1.Genemark.4326_g | MFS monocarboxylate transporter                             | Carbohydrate metabolism                        |
| 299 | -11.21   | Hetan1.Genemark.4817_g | beta-Keto acyl carrier protein reductase                    | Lipid metabolism, Fatty acid, Acetyl-CoA       |
| 300 | -96.542  | Hetan1.Genemark.4989_g | SMK1                                                        | Signal transduction, Transcription, DNA damage |
| 301 | -8.412   | Hetan1.Genemark.5376_g | Peptidase M50B                                              | Protein degradation                            |
| 302 | -47.953  | Hetan1.Genemark.5475_g | -                                                           |                                                |
| 303 | -4.951   | Hetan1.Genemark.5539_g | -                                                           |                                                |
| 304 | -5.027   | Hetan1.Genemark.5746_g | nitrite reductase                                           | N-metabolism ammonium                          |
| 305 | -6.445   | Hetan1.Genemark.6435_g | protein-tyrosine phosphatase                                | Signal transduction, Cell cycle control        |
| 306 | -28.659  | Hetan1.Genemark.6603_g | -                                                           |                                                |
| 307 | -11.186  | Hetan1.Genemark.6966_g | lep7, lignin medium expressed protein 7                     | Transcription carbohydrate metabolism lignin   |
| 308 | -8.906   | Hetan1.Genemark.7973_g | -                                                           |                                                |
| 309 | -9.483   | Hetan1.Genemark.9238_g | lep4, lignin medium expressed protein 4                     | Carbohydrate metabolism, lignin                |
| 310 | -4.003   | Hetan1.Genemark.9640_g | -                                                           |                                                |
| 311 | -163.391 | Hetan1.gw1.1.1854.1    | pectin methylesterase                                       | Carbohydrate metabolism pectin                 |
| 312 | -8.003   | Hetan1.gw1.12.56.1     | N-acylaminoacyl-peptide hydrolase                           | Protein degradation                            |
| 313 | -13.733  | Hetan1.gw1.9.332.1     | -                                                           |                                                |
| 314 | -14.952  | Hetan1.Genemark.9236_g | -                                                           |                                                |
| 315 | -7.65    | e_gw1.01.1649.1        | six-hairpin glycosidase-like protein                        | Carbohydrate metabolism                        |
| 316 | -16.369  | e_gw1.02.189.1         | P-loop containing nucleoside triphosphate hydrolase protein | Nucleotide metabolism                          |
| 317 | -7.408   | e_gw1.03.1713.1        | -                                                           | -                                              |
| 318 | -7.082   | e_gw1.05.2398.1        | -                                                           | -                                              |
| 319 | -308.451 | e_gw1.05.2603.1        | DNA polymerase IV                                           | DNA damage                                     |

|     |         |                               |                                                                                               |                                                                            |
|-----|---------|-------------------------------|-----------------------------------------------------------------------------------------------|----------------------------------------------------------------------------|
|     |         |                               |                                                                                               |                                                                            |
| 320 | -4.061  | e_gw1.08.1769.1               | archaerhodopsin-2                                                                             | Ion channel /<br>proton pump                                               |
| 321 | -9.475  | e_gw1.09.438.1                | -                                                                                             |                                                                            |
| 322 | -11.315 | e_gw1.12.629.1                | dephospho-CoA kinase                                                                          | Lipid metabolism<br>Mitochondria<br>energy<br>production                   |
| 323 | -36.813 | e_gw1.13.1294.1               | Peptidoglycan-binding LysM                                                                    | Cell wall /<br>membrane                                                    |
| 324 | -27.522 | estExt_fgenesh1_kg.C_040359   | Tyrosine protein kinase                                                                       | Kinases (signal<br>transduction)                                           |
| 325 | -26.015 | estExt_fgenesh1_kg.C_060034   | -                                                                                             |                                                                            |
| 326 | -16.993 | estExt_fgenesh1_kg.C_110167   | -                                                                                             |                                                                            |
| 327 | -12.556 | estExt_fgenesh1_kg.C_140228   | rRNA 2'-O-methyltransferase<br>Fibrillarin                                                    | Translation,<br>Ribosomes RNA<br>related                                   |
| 328 | -26.629 | estExt_fgenesh1_pg.C_020126   | dolichyl-<br>diphosphooligosaccharide--<br>protein glycosyltransferase<br>48 kDa subunit-like | Post-translational<br>protein<br>modification,<br>Protein<br>glycosylation |
| 329 | -12.791 | estExt_fgenesh1_pg.C_020714   | RNA-directed RNA<br>polymerase QDE-1                                                          | RNAi, RNA<br>related                                                       |
| 330 | -9.236  | estExt_fgenesh1_pg.C_090017   | -                                                                                             |                                                                            |
| 331 | -24.976 | estExt_fgenesh1_pm.C_100390   | -                                                                                             |                                                                            |
| 332 | -17.445 | estExt_fgenesh1_pm.C_120211   | -                                                                                             |                                                                            |
| 333 | -17.799 | estExt_Genemark.C_070135      | peptidase                                                                                     | Protein<br>degradation                                                     |
| 334 | -10.187 | estExt_Genemark.C_120379      | FAD-binding<br>monooxygenase                                                                  | Redox                                                                      |
| 335 | -14.345 | estExt_Genewise1.C_020032     | -                                                                                             | Cell wall /<br>membrane                                                    |
| 336 | -26.139 | estExt_Genewise1.C_091331     | U1-like zinc finger                                                                           | RNA related                                                                |
| 337 | -9.799  | estExt_Genewise1.C_120256     | rna helicase                                                                                  | RNA related                                                                |
| 338 | -8.428  | estExt_Genewise1Plus.C_020116 | -                                                                                             | -                                                                          |
| 339 | -49.743 | estExt_Genewise1Plus.C_051707 | transporter                                                                                   | Unspecific cell<br>transport                                               |
| 340 | -6.258  | estExt_Genewise1Plus.C_120696 | Transaldolase                                                                                 | Pentose<br>phosphate<br>pathway à                                          |

|     |          |                                                                  |                                                  |                                                                                                           |
|-----|----------|------------------------------------------------------------------|--------------------------------------------------|-----------------------------------------------------------------------------------------------------------|
|     |          |                                                                  |                                                  | NADPH glycolysis, Carbohydrate metabolism, Nucleotide metabolism, Lipid metabolism, Amino acid metabolism |
| 341 | -15.522  | fgenes1_kg.01_#_66_#_1583_1_CCOZ_CCPA_CCPB_CCPC_EXT_A            | -                                                |                                                                                                           |
| 342 | -4.248   | fgenes1_kg.01_#_67_#_1583_0_CCPB920.b1_CCOZ_CCPA_CCPB_CCPC_EXT_A | -                                                |                                                                                                           |
| 343 | -53.312  | fgenes1_kg.03_#_767_#_4245_1_CCOZ_CCPA_CCPB_CCPC_EXT_A           | -                                                |                                                                                                           |
| 344 | -57.23   | fgenes1_kg.05_#_424_#_0_0_CCOZ4875.b1_CCOZ_CCPA_CCPB_CCPC_EXT_A  | -                                                |                                                                                                           |
| 345 | -4.104   | fgenes1_kg.06_#_109_#_5379_1_CCOZ_CCPA_CCPB_CCPC_EXT_A           | chaperon                                         | Chaperons                                                                                                 |
| 346 | -15.86   | fgenes1_kg.10_#_5_#_4549_1_CCOZ_CCPA_CCPB_CCPC_EXT_A             | -                                                |                                                                                                           |
| 347 | -380.579 | fgenes1_pg.06_#_536                                              | -                                                |                                                                                                           |
| 348 | -15.668  | fgenes1_pg.13_#_262                                              | -                                                |                                                                                                           |
| 349 | -12.494  | fgenes1_pg.14_#_240                                              | -                                                |                                                                                                           |
| 350 | -22.61   | fgenes1_pm.03_#_82                                               | AAA+ ATPase                                      | -                                                                                                         |
| 351 | -593.949 | fgenes1_pm.04_#_184                                              | STE20-like serine/threonine kinase               | Cell cycle control, Kinases (signal transduction)                                                         |
| 352 | -7.949   | fgenes1_pm.07_#_191                                              | RIO1 atypical serine kinase                      | Cell cycle control, Kinases (signal transduction)                                                         |
| 353 | -11.16   | fgenes1_pm.08_#_371                                              | peptidase                                        | Protein degradation                                                                                       |
| 354 | -7.698   | fgenes1_pm.11_#_121                                              | -                                                | -                                                                                                         |
| 355 | -9.647   | fgenes1_pm.12_#_40                                               | histone-lysine n-methyltransferase ezh1-like     | Transcription repression                                                                                  |
| 356 | -15.778  | fgenes1_pm.14_#_95                                               | -                                                |                                                                                                           |
| 357 | -28.614  | Genemark.1248_g                                                  | -                                                |                                                                                                           |
| 358 | -49.041  | Genemark.2041_g                                                  | -                                                |                                                                                                           |
| 359 | -481.12  | Genemark.2126_g                                                  | peptidase                                        | Signal transduction, Protein degradation Increases aa uptake                                              |
| 360 | -10.781  | Genemark.33_g                                                    | -                                                |                                                                                                           |
| 361 | -9.005   | Genemark.3357_g                                                  | -                                                |                                                                                                           |
| 362 | -7.329   | Genemark.442_g                                                   | vacuolar protein sorting-associated protein VTA1 | endosomal function                                                                                        |

|     |           |                                      |                                                                      |                                                          |
|-----|-----------|--------------------------------------|----------------------------------------------------------------------|----------------------------------------------------------|
|     |           |                                      | homolog                                                              |                                                          |
| 363 | -5.739    | Genemark.5072_g                      | -                                                                    |                                                          |
| 364 | -4.623    | Genemark.5850_g                      | -                                                                    |                                                          |
| 365 | -7.158    | Genemark.6565_g                      | 12-oxophytodienoate reductase                                        | Redox                                                    |
| 366 | -37.981   | Genemark.7258_g                      | protein kinase                                                       | Kinases (signal transduction)                            |
| 367 | -202.249  | Genemark.7960_g                      | -                                                                    |                                                          |
| 368 | -6.115    | Genemark.8378_g                      | -                                                                    | RNA related                                              |
| 367 | -8.914    | Genemark.9061_g                      | -                                                                    |                                                          |
| 370 | -10.368   | gw1.03.1690.1                        | Protein kinase                                                       | Kinases (signal transduction)                            |
| 371 | -15.071   | gw1.04.2473.1                        | Transcription factor of the Forkhead/HNF3 family                     | transcription                                            |
| 372 | -9.523    | gw1.08.1665.1                        | Cell division control protein 7-like Protein Serine/Threonine Kinase | Cell cycle control                                       |
| 373 | -8.648    | gw1.12.1340.1                        | alpha-dehydro-beta-deoxy-D-glucarate aldolase                        | Mitochondria energy production, Pyruvate is product      |
| 374 | -4.974    | Hetan1.e_gw1.10.91.1                 | Sugar/inositol transporter                                           | Carbohydrate metabolism                                  |
| 375 | -5.532    | Hetan1.e_gw1.5.283.1                 | putative L-fuculose-phosphate aldolase (fucA)                        | Carbohydrate metabolism, Fructose and mannose metabolism |
| 376 | -33.381   | Hetan1.e_gw1.7.418.1                 | kinase                                                               | Molecular kinase (not protein kinase)                    |
| 377 | -22.281   | Hetan1.estExt_fgenes2_pg.C_100320    | phenol 2-monooxygenase                                               | Detoxification, Aromatic compound metabolism             |
| 378 | -6.481    | Hetan1.estExt_fgenes2_pm.C_100194    | -                                                                    |                                                          |
| 379 | -17.843   | Hetan1.estExt_fgenes3_kg.C_10018     | -                                                                    |                                                          |
| 380 | -7.659    | Hetan1.estExt_fgenes3_kg.C_100192    | MFS glucose transporter                                              | Carbohydrate metabolism, Glucose                         |
| 381 | -11.814   | Hetan1.estExt_fgenes3_kg.C_110064    | MFS glucose transporter                                              | Carbohydrate metabolism, Glucose                         |
| 382 | -14.828   | Hetan1.estExt_fgenes3_kg.C_110205    | lignin medium expressed protein 12, lep12                            | Carbohydrate metabolism, lignin                          |
| 384 | -4.547    | Hetan1.estExt_fgenes3_kg.C_60112     | -                                                                    |                                                          |
| 385 | -47.113   | Hetan1.estExt_Genewise1Plus.C_100341 | alpha/beta hydrolase fold                                            | Redox                                                    |
| 386 | -19.347   | Hetan1.estExt_Genewise1Plus.C_100682 | MFS glucose transporter                                              | Carbohydrate metabolism, Glucose                         |
| 387 | -1388.277 | Hetan1.EuGene1000636                 | HD1 homeodomain transcription factor, mating type protein            | Sex, Transcription                                       |
| 388 | -6.796    | Hetan1.EuGene13000249                | -                                                                    |                                                          |

|     |         |                                                                             |                                         |                                                                                   |
|-----|---------|-----------------------------------------------------------------------------|-----------------------------------------|-----------------------------------------------------------------------------------|
| 389 | -5.576  | Hetan1.EuGene5000616                                                        | cytochrome P450 monooxygenase 23, cyp23 | Detoxification<br>Redox                                                           |
| 390 | -23.692 | Hetan1.EuGene8000195                                                        | -                                       |                                                                                   |
| 391 | -17.958 | Hetan1.EuGene9000385                                                        | Piwi-domain-containing protein          | RNA related                                                                       |
| 392 | -11.565 | Hetan1.fgenes2_pg.C_scaffold_13000145                                       | Formin homology protein                 | Cell cycle control                                                                |
| 393 | -12.73  | Hetan1.fgenes2_pg.C_scaffold_8000178                                        | -                                       |                                                                                   |
| 394 | -8.111  | Hetan1.fgenes2_pm.C_scaffold_16000017                                       | 2OG-Fe(II) oxygenase family protein     | Redox                                                                             |
| 395 | -73.271 | Hetan1.fgenes3_kg.4_#_519_#_4514_0_C<br>COZ805.b1_CCOZ_CCPA_CCPB_CCPC_EXT_A | -                                       |                                                                                   |
| 396 | -16.313 | Hetan1.Genemark.1190_g                                                      | Cytochrome P450 monooxygenase 115       | Detoxification<br>Redox                                                           |
| 397 | -37.315 | Hetan1.Genemark.1932_g                                                      |                                         |                                                                                   |
| 398 | -15.081 | Hetan1.Genemark.2637_g                                                      | -                                       |                                                                                   |
| 399 | -5.735  | Hetan1.Genemark.293_g                                                       | -                                       |                                                                                   |
| 400 | -16.625 | Hetan1.Genemark.48_g                                                        | -                                       |                                                                                   |
| 401 | -41.979 | Hetan1.Genemark.4888_g                                                      | cytochrome P450 monooxygenase 1, cyp1   | Detoxification<br>Redox                                                           |
| 402 | -5.798  | Hetan1.Genemark.6765_g                                                      | NTPase-like protein                     | -                                                                                 |
| 403 | -7.02   | Hetan1.Genemark.6963_g                                                      | lignin expressed protein - lep1         | Carbohydrate metabolism,<br>lignin                                                |
| 404 | -7.357  | Hetan1.Genemark.7152_g                                                      | -                                       |                                                                                   |
| 405 | -7.212  | Hetan1.Genemark.7431_g                                                      | -                                       |                                                                                   |
| 406 | -21.091 | Hetan1.Genemark.8356_g                                                      | Aldo/keto reductase                     | Redox                                                                             |
| 407 | -11.005 | Hetan1.Genemark.8846_g                                                      | beta-xylosidase                         | Carbohydrate metabolism,<br>Hemicellulose                                         |
| 408 | -23.658 | Hetan1.gw1.11.527.1                                                         | HMG-box transcription factor SOX5       | Transcription                                                                     |
| 409 | -11.802 | Hetan1.gw1.11.531.1                                                         |                                         |                                                                                   |
| 410 | 4.697   | e_gw1.01.2177.1                                                             | terpenoid synthase                      | Lipid metabolism,<br>Sterol synthesis,<br>Cell membrane                           |
| 411 | 9.203   | e_gw1.01.2627.1                                                             | hydrolase                               | -                                                                                 |
| 412 | 4.781   | e_gw1.01.2919.1                                                             |                                         |                                                                                   |
| 413 | 4.806   | e_gw1.02.2634.1                                                             | Chorismase synthase                     | Amino acid metabolism,<br>Aromatic compounds synthesis,<br>Shikimate acid pathway |
| 414 | 8.413   | e_gw1.02.3296.1                                                             | cytochrome c oxidase copper chaperone   | Chaperone,<br>Mitochondria,<br>Energy production                                  |
| 415 | 5.813   | e_gw1.02.3483.1                                                             | Adenylate kinase                        | Energy production,<br>AMP amount                                                  |
| 416 | 4.212   | e_gw1.04.1139.1                                                             | Receptor Protein Tyrosine Kinase        | Signal transduction                                                               |
| 417 | 5.479   | e_gw1.04.2235.1                                                             | delta7-sterol-C-5-desaturase            | Lipid metabolism,<br>Ergosterol biosynthesis,<br>Cell membrane                    |
| 418 | 16.619  | e_gw1.04.2611.1                                                             | Taurine catabolism                      | Sulphite                                                                          |



|     |         |                            |                                                                     |                                                                                               |
|-----|---------|----------------------------|---------------------------------------------------------------------|-----------------------------------------------------------------------------------------------|
|     |         |                            | dioxygenase TauD                                                    | metabolism,<br>Indicative of<br>absence of sulfate                                            |
| 419 | 7.699   | e_gw1.05.1967.1            | 3-deoxy-D-arabino-<br>heptulosonate 7-phosphate<br>(DAHP) synthase  | Lipid metabolism,<br>Shikimate<br>pathway                                                     |
| 420 | 9.6     | e_gw1.05.2261.1            | -                                                                   |                                                                                               |
| 421 | 4.269   | e_gw1.06.1825.1            | Histone deacetylase                                                 | Transcription,<br>Cell cycle control                                                          |
| 422 | 14.457  | e_gw1.06.412.1             | phenol 2-monooxygenase                                              | aromatic<br>compounds<br>catabolism                                                           |
| 423 | 6.482   | e_gw1.06.495.1             | -                                                                   |                                                                                               |
| 424 | 7.637   | e_gw1.08.1568.1            | squalene epoxidase                                                  | Sterol synthesis                                                                              |
| 425 | 19.405  | e_gw1.09.1227.1            | alpha/beta-hydrolase                                                | -                                                                                             |
| 426 | 14.231  | e_gw1.10.853.1             | small heat-shock protein<br>Hsp26/Hsp42                             | Chaperone                                                                                     |
| 427 | 140.549 | e_gw1.11.1529.1            | -                                                                   |                                                                                               |
| 428 | 73.167  | e_gw1.11.1662.1            | -                                                                   |                                                                                               |
| 429 | 4.012   | e_gw1.11.404.1             | Glycosyl hydrolase family<br>43                                     | Carbohydrate<br>metabolism                                                                    |
| 430 | 8.468   | e_gw1.13.1032.1            | Pentafunctional AroM<br>protein                                     | Amino acid<br>metabolism,<br>Aromatic<br>compounds<br>synthesis,<br>Shikimate acid<br>pathway |
| 431 | 13.576  | e_gw1.13.1308.1            | -                                                                   |                                                                                               |
| 432 | 6.156   | e_gw1.13.638.1             | -                                                                   |                                                                                               |
| 433 | 6.891   | e_gw1.14.1091.1            | -                                                                   | Oxidation-<br>reduction process                                                               |
| 434 | 11.456  | e_gw1.14.1135.1            | -                                                                   |                                                                                               |
| 435 | 8.46    | estExt_fgenes1_kg.C_010315 | Protoglobin                                                         | Oxygen sensor?                                                                                |
| 436 | 132.879 | estExt_fgenes1_kg.C_010505 | short-chain alcohol<br>dehydrogenase                                | Oxidation-<br>reduction process                                                               |
| 437 | 4.116   | estExt_fgenes1_kg.C_030424 | fatty acid elongase 3-<br>ketoacyl-CoA synthase 1<br>domain protein | Lipid metabolism                                                                              |
| 438 | 10.44   | estExt_fgenes1_kg.C_030713 | D-lactaldehyde<br>dehydrogenase                                     | Fermentation,<br>Pyruvate<br>metabolism                                                       |
| 439 | 5.982   | estExt_fgenes1_kg.C_040495 | Galactokinase                                                       | Carbohydrate<br>metabolism,<br>Leloir pathway                                                 |
| 440 | 5.292   | estExt_fgenes1_kg.C_080387 | -                                                                   |                                                                                               |
| 441 | 41.545  | estExt_fgenes1_kg.C_080388 | -                                                                   |                                                                                               |
| 442 | 30.521  | estExt_fgenes1_kg.C_100061 | short-chain alcohol<br>dehydrogenases                               | Oxidation-<br>reduction process                                                               |
| 443 | 17.521  | estExt_fgenes1_kg.C_110012 | -                                                                   |                                                                                               |
| 444 | 7.536   | estExt_fgenes1_kg.C_130044 | -                                                                   |                                                                                               |
| 445 | 5.89    | estExt_fgenes1_pg.C_030798 | -                                                                   |                                                                                               |
| 446 | 16.528  | estExt_fgenes1_pg.C_040344 | IucA/IucC<br>Siderophore synthetase<br>component                    | Metal metabolism                                                                              |
| 447 | 4.95    | estExt_fgenes1_pg.C_090021 | metacaspase                                                         | Programmed cell<br>death                                                                      |
| 448 | 5.554   | estExt_fgenes1_pg.C_110327 | Homeodomain-containing<br>transcription factor                      | Transcription                                                                                 |

|     |        |                               |                                                               |                                                                             |
|-----|--------|-------------------------------|---------------------------------------------------------------|-----------------------------------------------------------------------------|
| 449 | 6.214  | estExt_fgenesh1_pg.C_140172   | DNA polymerase IV (family X)                                  | DNA damage                                                                  |
| 450 | 4.042  | estExt_fgenesh1_pm.C_011095   | golgin                                                        | Golgi function                                                              |
| 451 | 9.856  | estExt_fgenesh1_pm.C_030160   | homoserine o-acetyltransferase                                | Amino acid metabolism, Methionin synthesis                                  |
| 452 | 4.935  | estExt_fgenesh1_pm.C_030891   | cytochrome b2                                                 | Energy production                                                           |
| 453 | 7.824  | estExt_fgenesh1_pm.C_040709   | -                                                             |                                                                             |
| 454 | 7.309  | estExt_fgenesh1_pm.C_080008   | -                                                             |                                                                             |
| 455 | 11.036 | estExt_fgenesh1_pm.C_080652   | -                                                             |                                                                             |
| 456 | 22.542 | estExt_fgenesh1_pm.C_090057   | Aldo-keto reductases                                          | oxidation-reduction process                                                 |
| 457 | 4.209  | estExt_fgenesh1_pm.C_090444   | Hydroxymethylglutaryl-CoA synthase                            | Lipid metabolism, Sterol synthesis, Mevalonate pathway, terpenoid synthesis |
| 458 | 17.498 | estExt_fgenesh1_pm.C_110048   | 2-cysteine peroxiredoxin                                      | Oxidative stress                                                            |
| 459 | 29.034 | estExt_Genemark.C_020382      | -                                                             |                                                                             |
| 460 | 4.454  | estExt_Genemark.C_040233      | Separins?                                                     | Cell cycle control                                                          |
| 461 | 12.314 | estExt_Genemark.C_060605      | major facilitator superfamily transporters                    |                                                                             |
| 462 | 4.4    | estExt_Genemark.C_060709      | -                                                             |                                                                             |
| 463 | 9.653  | estExt_Genemark.C_080024      | transcription factor                                          | Transcription                                                               |
| 464 | 4.491  | estExt_Genemark.C_080155      | methyltransferase                                             | -                                                                           |
| 465 | 4.304  | estExt_Genemark.C_080215      | septation ring formation regulator EzrA -like                 | Cell cycle regulation, Negative regulation of septation                     |
| 466 | 4.897  | estExt_Genemark.C_110407      | phospholipase D                                               | Lipid metabolism, Cell membrane, Signal transduction, Endosome function     |
| 467 | 6.348  | estExt_Genemark.C_120043      | -                                                             |                                                                             |
| 468 | 5.156  | estExt_Genemark.C_120355      | cytochrome b2                                                 | Energy production                                                           |
| 469 | 4.163  | estExt_Genewise1.C_031030     | Glutamine synthetase                                          | Amino acid metabolism                                                       |
| 470 | 4.111  | estExt_Genewise1.C_080549     | receptor-activated Ca <sup>2+</sup> -permeable cation channel | Ion metabolism                                                              |
| 471 | 4.223  | estExt_Genewise1.C_081179     | sterol o-acyltransferase                                      | Lipid metabolism, Cell cycle control, Sporulation, Sex, Sterol metabolism   |
| 472 | 9.502  | estExt_Genewise1.C_140929     | -                                                             |                                                                             |
| 473 | 14.848 | estExt_Genewise1Plus.C_010240 | UDP-glucose 4-epimerase                                       | Carbohydrate metabolism<br>Leloir pathway                                   |
| 474 | 6.91   | estExt_Genewise1Plus.C_010621 | -                                                             |                                                                             |
| 475 | 8.165  | estExt_Genewise1Plus.C_012733 | alpha-ketoglutarate-dependent sulfonate dioxygenase           | Sulphite metabilia                                                          |
| 476 | 10.039 | estExt_Genewise1Plus.C_012758 | Carbonic anhydrases                                           | Carbon fixation                                                             |

|     |         |                                                                           |                                                                                          |                                                                                       |
|-----|---------|---------------------------------------------------------------------------|------------------------------------------------------------------------------------------|---------------------------------------------------------------------------------------|
| 477 | 44.682  | estExt_Genewise1Plus.C_021169                                             |                                                                                          |                                                                                       |
| 478 | 4.843   | estExt_Genewise1Plus.C_021367                                             | Galactose-1-phosphate<br>uridylyltransferase                                             | Carbohydrate<br>metabolism,<br>Leloir pathway                                         |
| 479 | 4.835   | estExt_Genewise1Plus.C_022322                                             | cupredoxin                                                                               | Electron transfer                                                                     |
| 480 | 4.797   | estExt_Genewise1Plus.C_030660                                             | -                                                                                        |                                                                                       |
| 481 | 5.29    | estExt_Genewise1Plus.C_031102                                             | -                                                                                        |                                                                                       |
| 482 | 4.313   | estExt_Genewise1Plus.C_040229                                             | cep5 cellulose medium<br>expressed protein 5<br>Aminoglycoside 3'-<br>phosphotransferase | Carbohydrate<br>metabolism<br>Small molecule<br>inactivation                          |
| 483 | 16.885  | estExt_Genewise1Plus.C_040941                                             | NAD dependent<br>epimerase/dehydratase 1<br>Nucleoside-diphosphate-<br>sugar epimerase   | Carbohydrate<br>metabolism                                                            |
| 484 | 5.13    | estExt_Genewise1Plus.C_060199                                             | phenol 2-monooxygenase                                                                   | Aromatic<br>compounds<br>catabolism                                                   |
| 485 | 6.679   | estExt_Genewise1Plus.C_061412                                             | Shikimate 5-dehydrogenase                                                                | Carbohydrate<br>metabolism<br>shikimate acid<br>pathway                               |
| 486 | 4.359   | estExt_Genewise1Plus.C_071035                                             | Regulatory protein MLP and<br>related LIM proteins                                       | Signal<br>transduction                                                                |
| 487 | 4.597   | estExt_Genewise1Plus.C_071244                                             | Subunit 21 of Mediator<br>complex                                                        | Transcription                                                                         |
| 488 | 9.118   | estExt_Genewise1Plus.C_080415                                             | -                                                                                        |                                                                                       |
| 489 | 4.985   | estExt_Genewise1Plus.C_080577                                             | ubiquinone biosynthesis<br>hydroxylase family protein                                    | Energy<br>production,<br>Electron transfer,<br>Mitochondria,<br>Mevalonate<br>pathway |
| 490 | 4.42    | estExt_Genewise1Plus.C_081191                                             | DOPA 4,5-dioxygenase                                                                     | oxidative stress?<br>Carbohydrate<br>metabolism?                                      |
| 491 | 4.7     | estExt_Genewise1Plus.C_110025                                             |                                                                                          |                                                                                       |
| 492 | 162.423 | estExt_Genewise1Plus.C_110307                                             | pentachlorophenol 4-<br>monooxygenase                                                    | aromatic<br>compounds<br>catabolism<br>Small molecule<br>inactivation                 |
| 493 | 5.697   | estExt_Genewise1Plus.C_110862                                             | glucooligosaccharide oxidase                                                             | Carbohydrate<br>metabolism                                                            |
| 494 | 9.297   | estExt_Genewise1Plus.C_110926                                             | Aldo/keto reductase                                                                      | Oxidation-<br>reduction process                                                       |
| 495 | 27.853  | estExt_Genewise1Plus.C_120304                                             | 3-oxoacyl-[acyl-carrier-<br>protein] reductase                                           | Lipid metabolism<br>Fatty acid<br>synthesis                                           |
| 496 | 5.708   | fgenes1_kg.01_#_263_#_897_1_CCOZ_C<br>CPA_CCPB_CCPC_EXT A                 | -                                                                                        |                                                                                       |
| 497 | 4.109   | fgenes1_kg.01_#_652_#_3189_1_CCOZ_<br>CCPA_CCPB_CCPC_EXT A                | -                                                                                        |                                                                                       |
| 498 | 4.245   | fgenes1_kg.02_#_311_#_1194_1_CCOZ_<br>CCPA_CCPB_CCPC_EXT A                | tetraspanin                                                                              | Cell membrane<br>processes                                                            |
| 499 | 23.436  | fgenes1_kg.02_#_603_#_5185_0_CCPC4<br>567.g1_CCOZ_CCPA_CCPB_CCPC_EXT<br>A | -                                                                                        |                                                                                       |
| 500 | 17.396  | fgenes1_kg.05_#_437_#_1624_1_CCOZ_                                        | anthranilate                                                                             | Amino acid                                                                            |

|     |        |                                                                    |                                                          |                                                                                        |
|-----|--------|--------------------------------------------------------------------|----------------------------------------------------------|----------------------------------------------------------------------------------------|
|     |        | CCPA_CCPB_CCPC_EXT_A                                               | phosphoribosyltransferase                                | metabolism                                                                             |
| 501 | 5.91   | fgenes1_kg.06_#_190_#_5273_0_CCPC6878.g1_CCOZ_CCPA_CCPB_CCPC_EXT_A | -                                                        |                                                                                        |
| 502 | 5.749  | fgenes1_kg.06_#_340_#_4618_1_CCOZ_CCPA_CCPB_CCPC_EXT_A             | Trypsin-like cysteine/serine peptidase                   | Protein degradation                                                                    |
| 503 | 7.662  | fgenes1_kg.07_#_79_#_165_1_CCOZ_CCPA_CCPB_CCPC_EXT_A               | Aldo-keto reductases                                     | Oxidation-reduction process                                                            |
| 504 | 7.596  | fgenes1_kg.08_#_143_#_1871_1_CCOZ_CCPA_CCPB_CCPC_EXT_A             | -                                                        |                                                                                        |
| 505 | 5.319  | fgenes1_kg.09_#_240_#_4283_1_CCOZ_CCPA_CCPB_CCPC_EXT_A             | alpha/beta-hydrolase                                     | Oxidation-reduction process                                                            |
| 506 | 33.827 | fgenes1_kg.09_#_97_#_266_1_CCOZ_CCPA_CCPB_CCPC_EXT_A               | Aldo/keto reductase                                      | Oxidation-reduction process                                                            |
| 507 | 8.114  | fgenes1_kg.13_#_101_#_165_1_CCOZ_CCPA_CCPB_CCPC_EXT_A              | Aldo/keto reductase                                      | oxidation-reduction process                                                            |
| 508 | 17.846 | fgenes1_pg.04_#_127                                                | proton-transporting two-sector ATPase complex            | Ion metabolism                                                                         |
| 509 | 4.205  | fgenes1_pg.04_#_342                                                | Cation transport ATPase                                  | Ion metabolism                                                                         |
| 510 | 56.723 | fgenes1_pg.05_#_630                                                | NADH flavin oxidoreductase/NADH oxidase                  | Oxidation-reduction process                                                            |
| 511 | 4.843  | fgenes1_pg.05_#_631                                                | NADH flavin oxidoreductase/NADH oxidase                  | Oxidation-reduction process                                                            |
| 512 | 22.604 | fgenes1_pg.06_#_13                                                 | G protein-coupled glucose receptor regulating Gpa2 ;Git3 | Carbohydrate metabolism, Glucose detection via activation of adenylate cyclase         |
| 513 | 30.298 | fgenes1_pg.09_#_296                                                | Dehydrogenase                                            |                                                                                        |
| 514 | 8.354  | fgenes1_pg.10_#_103                                                | -                                                        |                                                                                        |
| 515 | 7.113  | fgenes1_pg.11_#_188                                                | O-acetylhomoserine aminocarboxypropyltransferase         | Amino acid metabolism<br>Cysteine and methionine                                       |
| 516 | 4.203  | fgenes1_pm.02_#_1189                                               | Dehydrogenases                                           | Oxidation-reduction process                                                            |
| 517 | 4.879  | fgenes1_pm.02_#_779                                                | Fructose-1,6-bisphosphatase                              | Carbohydrate metabolism, Gluconeogenesis pathway                                       |
| 518 | 6.664  | fgenes1_pm.02_#_982                                                | LigT-like protein                                        | Translation, tRNA                                                                      |
| 519 | 5.193  | fgenes1_pm.03_#_546                                                | -                                                        |                                                                                        |
| 520 | 4.745  | fgenes1_pm.03_#_933                                                | -                                                        |                                                                                        |
| 521 | 6.269  | fgenes1_pm.04_#_837                                                | Indoleamine 2,3-dioxygenase                              | Amino acid metabolism, Tryptophan catabolism, Kynurenine pathway/NAD+ production/redox |
| 522 | 21.063 | fgenes1_pm.08_#_137                                                | cytochrome P450 monooxygenase 45                         | Oxidative degradation                                                                  |
| 523 | 4.286  | fgenes1_pm.10_#_534                                                | isoamyl alcohol oxidase                                  | Amino acid metabolism?                                                                 |
| 524 | 11.468 | fgenes1_pm.11_#_431                                                | -                                                        |                                                                                        |
| 525 | 58.735 | fgenes1_pm.12_#_243                                                | delta9-fatty acid desaturase                             | Lipid metabolism                                                                       |

|     |        |                       |                                               |                                                                  |
|-----|--------|-----------------------|-----------------------------------------------|------------------------------------------------------------------|
| 526 | 13.811 | fgenesH1_pm.12_#_439  | Isoprenylcysteine carboxyl methyltransferase  | Cell membrane                                                    |
| 527 | 4.677  | Genemark.2177_g       | Pyridine nucleotide-disulphide oxidoreductase | Oxidation-reduction process                                      |
| 528 | 5.74   | Genemark.2322_g       | -                                             |                                                                  |
| 529 | 5.056  | Genemark.298_g        | -                                             |                                                                  |
| 530 | 7.847  | Genemark.3471_g       | Citrate synthase                              | Energy production<br>citric acid cycle                           |
| 531 | 5.231  | Genemark.3759_g       | .                                             |                                                                  |
| 532 | 13.604 | Genemark.4614_g       | alcohol dehydrogenase                         | Fermentation?<br>detoxification                                  |
| 533 | 4.944  | Genemark.6168_g       | trypsin-like serine and cysteine peptidase    | Protein degradation                                              |
| 534 | 4.83   | Genemark.6589_g       | -                                             | Transcription                                                    |
| 535 | 8.508  | Genemark.7893_g       | Pyridine nucleotide-disulphide oxidoreductase | Oxidation-reduction process                                      |
| 536 | 5.583  | Genemark.8651_g       | -                                             |                                                                  |
| 537 | 6.086  | Genemark.9054_g       | -                                             |                                                                  |
| 538 | 23.224 | gw1.01.3206.1         | transcription factor                          | Transcription                                                    |
| 539 | 5.963  | gw1.02.2781.1         | YeeE/YedE family protein                      | Sulphite metabolism<br>Sulphur transport                         |
| 540 | 4.162  | gw1.02.3193.1         | Cytochrome c oxidase subunit IV               | Energy production<br>mitochondria                                |
| 541 | 4.003  | gw1.03.3642.1         | -                                             |                                                                  |
| 542 | 10.6   | gw1.04.2350.1         | Alpha-beta-hydrolase                          | Oxidation-reduction process                                      |
| 543 | 5.072  | gw1.06.2171.1         | Transcription factor                          | Transcription                                                    |
| 544 | 14.048 | gw1.07.2121.1         | -                                             |                                                                  |
| 545 | 12.989 | gw1.08.1470.1         | -                                             |                                                                  |
| 546 | 17.969 | gw1.09.1495.1         | -                                             |                                                                  |
| 547 | 5.419  | gw1.09.1578.1         | -                                             |                                                                  |
| 548 | 4.308  | Hetan1.e_gw1.1.474.1  | secreted ribonuclease T2                      | Detoxification<br>defence                                        |
| 549 | 5.141  | Hetan1.e_gw1.11.388.1 | -                                             |                                                                  |
| 550 | 4.295  | Hetan1.e_gw1.13.668.1 |                                               | Carbohydrate metabolism<br>pentose phosphate pathway             |
| 551 | 11.484 | Hetan1.e_gw1.14.153.1 | lipase 2                                      | Lipid metabolism                                                 |
| 552 | 5.425  | Hetan1.e_gw1.14.57.1  | phospholipid/diacylglycerol acyltransferase   | Lipid metabolism<br>Sterol synthesis                             |
| 553 | 8.365  | Hetan1.e_gw1.2.1473.1 | quinone oxidoreductase 6, qor6                | Oxidation-reduction process,<br>Aromatic compounds<br>catabolism |
| 554 | 4.239  | Hetan1.e_gw1.4.254.1  | pantothenate transporter, putative            | Citric acid cycle,<br>Coenzyme-A synthesis,<br>Lipid metabolism  |
| 555 | 8.546  | Hetan1.e_gw1.4.255.1  | Amino acid transporter                        | Amino acid metabolism                                            |
| 556 | 4.203  | Hetan1.e_gw1.4.367.1  | Permease of the major facilitator superfamily | Cell transport                                                   |
| 557 | 5.755  | Hetan1.e_gw1.4.803.1  | -                                             |                                                                  |
| 558 | 5.114  | Hetan1.e_gw1.7.75.1   | 4-hydroxybenzoate                             | Cell transport,                                                  |

|     |        |                                   |                                                                                   |                                                                        |
|-----|--------|-----------------------------------|-----------------------------------------------------------------------------------|------------------------------------------------------------------------|
|     |        |                                   | transporter                                                                       | Aromatic compounds catabolism                                          |
| 559 | 7.124  | Hetan1.e_gw1.8.125.1              | Cytochrome P450, cpm82                                                            | oxidative degradation                                                  |
| 560 | 6.533  | Hetan1.e_gw1.8.675.1              | vacuolar DHA amino acid exporter                                                  | Amino acid metabolism, Amino acid storage                              |
| 561 | 88.307 | Hetan1.e_gw1.8.682.1              | cytochrome P450 monooxygenase 4, cyp4                                             | Oxidative degradation                                                  |
| 562 | 8.794  | Hetan1.e_gw1.9.799.1              |                                                                                   |                                                                        |
| 563 | 18.878 | Hetan1.e_gw1.9.87.1               | MFS monosaccharide transporter                                                    | Carbohydrate metabolism                                                |
| 564 | 72.483 | Hetan1.estExt_fgenes2_pm.C_10179  | ABC transporter: heme ABC exporter                                                | Metal metabolism                                                       |
| 565 | 10.877 | Hetan1.estExt_fgenes2_pm.C_130083 | quinone oxidoreductase 18, qor18                                                  | Oxidation-reduction process, Aromatic compounds catabolism             |
| 566 | 9.276  | Hetan1.estExt_fgenes2_pm.C_180013 | oligopeptide transporter protein                                                  | Amino acid metabolism                                                  |
| 567 | 7.882  | Hetan1.estExt_fgenes2_pm.C_30038  | -                                                                                 |                                                                        |
| 568 | 11.212 | Hetan1.estExt_fgenes2_pm.C_30280  | bifunctional sulfate adenylyltransferase subunit 1/adenylylsulfate kinase protein | Sulphite metabolia                                                     |
| 569 | 4.592  | Hetan1.estExt_fgenes2_pm.C_40252  | Alpha-amylase                                                                     | Carbohydrate metabolism, Starch, glycogen                              |
| 570 | 16.526 | Hetan1.estExt_fgenes2_pm.C_60042  | Choline dehydrogenase 4, chd4                                                     | Reduction process, Glycine, serine and threonine metabolism            |
| 571 | 12.899 | Hetan1.estExt_fgenes2_pm.C_70066  | fruit-body specific gene C                                                        | Sex, Fruiting body                                                     |
| 572 | 11.21  | Hetan1.estExt_fgenes2_pm.C_70087  | aryl-alcohol oxidase 12, aao12                                                    | Aromatic compounds catabolism                                          |
| 573 | 48.804 | Hetan1.estExt_fgenes2_pm.C_70196  | methyltransferase                                                                 | -                                                                      |
| 574 | 33.302 | Hetan1.estExt_fgenes2_pm.C_90223  | -                                                                                 |                                                                        |
| 575 | 8.91   | Hetan1.estExt_fgenes3_kg.C_100170 | Major facilitator superfamily                                                     | -                                                                      |
| 576 | 8.103  | Hetan1.estExt_fgenes3_kg.C_130022 | -                                                                                 |                                                                        |
| 577 | 6.824  | Hetan1.estExt_fgenes3_kg.C_20469  | epsin-like protein ent1 2                                                         | Cell membrane, Endocytosis                                             |
| 578 | 10.319 | Hetan1.estExt_fgenes3_kg.C_30165  | MFS nicotinic acid transporter Tna1                                               | Oxidation-reduction process, Energy production                         |
| 579 | 5.923  | Hetan1.estExt_fgenes3_kg.C_30237  | glyoxal oxidase 2, glox2                                                          | Oxidation-reduction process, Oxidative degradation, Lignin degradation |
| 580 | 17.079 | Hetan1.estExt_fgenes3_kg.C_30410  | quinone oxidoreductase 16, qor16                                                  | Oxidation-reduction process,                                           |

|     |        |                                      |                                           |                                                                  |
|-----|--------|--------------------------------------|-------------------------------------------|------------------------------------------------------------------|
|     |        |                                      |                                           | Aromatic compounds catabolism                                    |
| 581 | 6.252  | Hetan1.estExt_fgenes3_kg.C_40221     | Chloroperoxidase 2, cpx2                  | Oxidation-reduction process, Chlorination, Oxidative degradation |
| 582 | 22.855 | Hetan1.estExt_fgenes3_kg.C_40528     | cytochrome P450 monooxygenase 36, cyp36   | Oxidative degradation                                            |
| 583 | 6.649  | Hetan1.estExt_fgenes3_kg.C_60126     | -                                         |                                                                  |
| 584 | 16.185 | Hetan1.estExt_fgenes3_kg.C_70052     | highly expressed on lignin media          | Carbohydrate metabolism, Lignin degradation                      |
| 585 | 9.988  | Hetan1.estExt_fgenes3_kg.C_80054     | Cytochrome P450 monooxygenase 100, cpm100 |                                                                  |
| 586 | 13.308 | Hetan1.estExt_fgenes3_kg.C_80070     | -                                         |                                                                  |
| 587 | 4.209  | Hetan1.estExt_fgenes3_kg.C_80090     | Ferric reductase                          | Ion metabolism, Metal metabolism, Oxidation-reduction process    |
| 588 | 11.799 | Hetan1.estExt_fgenes3_kg.C_90003     | Glutathione S-transferase, GST1           | detoxification                                                   |
| 588 | 78.124 | Hetan1.estExt_Genewise1.C_100265     | hydrolase                                 | -                                                                |
| 590 | 86.362 | Hetan1.estExt_Genewise1.C_120774     | ferric reductase                          | Ion metabolism metal metabolism oxidation-reduction process      |
| 591 | 17.936 | Hetan1.estExt_Genewise1.C_130249     | sugar:H <sup>+</sup> symporter            | Carbohydrate metabolism                                          |
| 592 | 23.73  | Hetan1.estExt_Genewise1.C_130445     | aryl-alcohol oxidase 6, aao6              | Aromatic compounds catabolism                                    |
| 593 | 35.495 | Hetan1.estExt_Genewise1.C_21412      | high affinity sulphate transporter 1      | Sulphite metabolia                                               |
| 594 | 8.117  | Hetan1.estExt_Genewise1.C_41556      | Cytochrome oxidase assembly factor COX15  | Energy production, mitochondria                                  |
| 595 | 16.066 | Hetan1.estExt_Genewise1.C_60107      | Secreted Lipase, class 3                  | Lipid metabolism                                                 |
| 596 | 74.799 | Hetan1.estExt_Genewise1.C_80752      | aryl-alcohol oxidase 3, aao3              | Aromatic compounds catabolism                                    |
| 597 | 14.879 | Hetan1.estExt_Genewise1Plus.C_10610  | phthalate transporter                     | Aromatic compounds catabolism                                    |
| 598 | 4.039  | Hetan1.estExt_Genewise1Plus.C_130082 | MFS polyamine transporter                 | N-metabolism                                                     |
| 599 | 6.809  | Hetan1.estExt_Genewise1Plus.C_160207 | GMC oxidoreductase 8, gor8                | Oxidation-reduction process Aromatic compounds catabolism        |
| 600 | 19.921 | Hetan1.estExt_Genewise1Plus.C_170060 | MFS quinate transporter, qui              | Carbohydrate metabolism, Aromatic compounds catabolism           |

|     |        |                                       |                                                      |                                                                  |
|-----|--------|---------------------------------------|------------------------------------------------------|------------------------------------------------------------------|
| 601 | 4.243  | Hetan1.estExt_Genewise1Plus.C_21883   | a-glucosidase, Glycoside Hydrolase Family 31 protein | Carbohydrate metabolism, Strach degradation                      |
| 602 | 4.536  | Hetan1.estExt_Genewise1Plus.C_21961   | MFS polyamine transporter                            | N-metabolism                                                     |
| 603 | 6.66   | Hetan1.estExt_Genewise1Plus.C_30278   | quinone oxidoreductase 5, qor5                       | Oxidation-reduction process, Aromatic compounds catabolism       |
| 604 | 7.61   | Hetan1.estExt_Genewise1Plus.C_31727   | endochitinase                                        | Cell wall                                                        |
| 605 | 4.789  | Hetan1.estExt_Genewise1Plus.C_40163   | Secreted serine protease S53                         | Protein degradation                                              |
| 606 | 10.045 | Hetan1.estExt_Genewise1Plus.C_41737   | MFS drug/polyamine transporter                       | N-metabolism                                                     |
| 607 | 6.435  | Hetan1.estExt_Genewise1Plus.C_60912   | Mitochondrial carrier protein MRS3/4                 | Energy production, Mitochondria, Metal metabolism, Iron transfer |
| 608 | 35.318 | Hetan1.estExt_Genewise1Plus.C_61257   | Catalase                                             | Oxidative stress, Detoxification: H2O2                           |
| 609 | 5.715  | Hetan1.estExt_Genewise1Plus.C_70313   | carboxylic acid transporter protein                  | Amino acid metabolism lipid metabolism                           |
| 610 | 4.683  | Hetan1.estExt_Genewise1Plus.C_70834   | NADPH cytochrome P450 reductase (CYPOR1)             | Oxidation-reduction process                                      |
| 611 | 5.365  | Hetan1.estExt_Genewise1Plus.C_90814   | ABC-transporter protein                              | Transport                                                        |
| 612 | 8.597  | Hetan1.EuGene10000525                 |                                                      |                                                                  |
| 613 | 10.512 | Hetan1.EuGene10000605                 | -                                                    |                                                                  |
| 614 | 5.54   | Hetan1.EuGene1000294                  | -                                                    |                                                                  |
| 615 | 6.332  | Hetan1.EuGene1000624                  | -                                                    |                                                                  |
| 616 | 6.859  | Hetan1.EuGene1000671                  | alpha/beta-hydrolase                                 | Oxidation-reduction process                                      |
| 617 | 4.498  | Hetan1.EuGene1001337                  | -                                                    |                                                                  |
| 618 | 6.948  | Hetan1.EuGene1001353                  | Beta-lactamase                                       | Detoxification, Defence                                          |
| 619 | 4.232  | Hetan1.EuGene14000174                 | N-acetyl-glucosamine-6-phosphate deacetylase         | Carbohydrate metabolism, Cell wall                               |
| 620 | 13.6   | Hetan1.EuGene2000701                  | -                                                    |                                                                  |
| 621 | 4.569  | Hetan1.EuGene2001183                  | Expansin                                             | Cell wall                                                        |
| 622 | 4.887  | Hetan1.EuGene4000482                  | cytochrome P450 monooxygenase 88, cyp88              | Oxidative degradation                                            |
| 623 | 5.638  | Hetan1.EuGene8000110                  | long-chain fatty acid CoA synthetases                | Lipid metabolism                                                 |
| 624 | 4.438  | Hetan1.EuGene8000406                  | Cytochrome P450 monooxygenase 92, cpm92              | Oxidative degradation                                            |
| 625 | 5.129  | Hetan1.fgenes2_pg.C_scaffold_15000038 | -                                                    |                                                                  |
| 626 | 7.028  | Hetan1.fgenes2_pg.C_scaffold_5000228  | oxidoreductases                                      | Oxidation-reduction process                                      |
| 627 | 11.312 | Hetan1.fgenes2_pg.C_scaffold_5000293  | -                                                    |                                                                  |
| 628 | 4.778  | Hetan1.fgenes2_pg.C_scaffold_7000321  | -                                                    |                                                                  |
| 629 | 7.076  | Hetan1.fgenes2_pm.C_scaffold_12000183 | uridine permease Fui1                                | Nucleotide metabolism                                            |
| 630 | 13.003 | Hetan1.fgenes2_pm.C_scaffold_2000190  | MFS amino acid permease                              | Amino acid                                                       |



|     |         |                                                               |                                                                                               |                                                                 |
|-----|---------|---------------------------------------------------------------|-----------------------------------------------------------------------------------------------|-----------------------------------------------------------------|
|     |         |                                                               |                                                                                               | metabolism                                                      |
| 631 | 4.399   | Hetan1.fgenes2_pm.C_scaffold_3000337                          | Inosine-uridine nucleoside N-ribohydrolase                                                    | Nucleotide metabolism                                           |
| 632 | 10.409  | Hetan1.fgenes2_pm.C_scaffold_4000008                          | siderochrome-iron transporter Sit1                                                            | Metal metabolism                                                |
| 633 | 4.549   | Hetan1.fgenes2_pm.C_scaffold_4000675                          | -                                                                                             |                                                                 |
| 634 | 12.179  | Hetan1.fgenes2_pm.C_scaffold_9000210                          | 3-ketoacyl-acyl carrier protein reductase                                                     | Lipid metabolism                                                |
| 635 | 23.235  | Hetan1.fgenes3_kg.13_#_160_#_3340_1_CCOZ_CCPA_CCPB_CCPC_EXT_A | Glycoside Hydrolase Family 12 protein candidate endo-b-1,4-glucanase or xyloglucanase, gh12.3 | Carbohydrate metabolism, Cellulose or hemicellulose degradation |
| 636 | 6.732   | Hetan1.fgenes3_kg.8_#_108_#_5336_1_CCOZ_CCPA_CCPB_CCPC_EXT_A  | dehydrogenase                                                                                 | Oxidation-reduction process                                     |
| 637 | 4.849   | Hetan1.fgenes3_kg.8_#_121_#_2183_1_CCOZ_CCPA_CCPB_CCPC_EXT_A  | molybdopterin-biosynthesis enzyme                                                             | Oxidation-reduction process                                     |
| 638 | 6.592   | Hetan1.Genemark.4297_g                                        | Cytochrome P450 monooxygenase 76, cpm76                                                       | oxidative degradation                                           |
| 639 | 20.242  | Hetan1.Genemark.4417_g                                        | dioxygenases                                                                                  | Oxidation-reduction process                                     |
| 640 | 32.202  | Hetan1.Genemark.4807_g                                        | Choline dehydrogenase 7, chd7                                                                 | Oxidation-reduction process                                     |
| 641 | 4.553   | Hetan1.Genemark.696_g                                         | Alpha/beta hydrolase                                                                          | oxidation-reduction process                                     |
| 642 | 12.311  | Hetan1.Genemark.73_g                                          | The Major Facilitator Superfamily                                                             | Transport                                                       |
| 643 | 5.283   | Hetan1.Genemark.9730_g                                        | dimethylaniline monooxygenase                                                                 | Oxidation-reduction process, Aromatic compounds catabolism      |
| 644 | 52.332  | Hetan1.gw1.14.303.1                                           | -                                                                                             |                                                                 |
| 645 | 4.339   | Hetan1.gw1.6.412.1                                            | -                                                                                             |                                                                 |
| 646 | 7.195   | Hetan1.YAI_gw1.12.856.1                                       | quinone oxidoreductase 2, qor2                                                                |                                                                 |
| 647 | 158.37  | estExt_Genemark.C_120425                                      | Cytochrome P450 CYP4/CYP19/CYP26 subfamilies                                                  | Detoxification, Redox                                           |
| 648 | 8.148   | estExt_Genewise1.C_012332                                     | glutathione transferase                                                                       | Detoxification                                                  |
| 649 | 9.321   | Hetan1.estExt_fgenes2_pm.C_20683                              | quinone oxidoreductase 11, qor11                                                              | Redox                                                           |
| 650 | 12.606  | Hetan1.estExt_Genewise1.C_80167                               | ABC transporter                                                                               | -                                                               |
| 651 | 19.659  | e_gw1.01.2810.1                                               | nucleoporin-interacting protein NIC96                                                         | Nuclear transport                                               |
| 652 | 6.641   | e_gw1.07.1277.1                                               | -                                                                                             |                                                                 |
| 653 | 8.974   | e_gw1.07.1789.1                                               | Uroporphyrinogen III synthase UROS/HEM4                                                       | Inorganics metabolism, Haem synthesis                           |
| 654 | 6.904   | e_gw1.09.761.1                                                | -                                                                                             |                                                                 |
| 655 | 7.237   | e_gw1.09.92.1                                                 | -                                                                                             |                                                                 |
| 656 | 225.423 | e_gw1.12.503.1                                                | sorbitol dehydrogenase                                                                        | Carbohydrate metabolism, Glucose to sorbitol to fructose        |
| 657 | 5.611   | estExt_fgenes1_kg.C_080207                                    | -                                                                                             |                                                                 |
| 658 | 56.045  | estExt_fgenes1_pg.C_080141                                    | -                                                                                             |                                                                 |

|     |         |                                                                    |                                              |                                                                                    |
|-----|---------|--------------------------------------------------------------------|----------------------------------------------|------------------------------------------------------------------------------------|
| 659 | 66.523  | estExt_fgenesh1_pg.C_130285                                        | -                                            |                                                                                    |
| 660 | 7.925   | estExt_Genewise1.C_060510                                          | cysteine synthase                            | Amino acid metabolism, Cysteine biosynthesis                                       |
| 661 | 871.124 | estExt_Genewise1Plus.C_080637                                      | -                                            | DNA damage                                                                         |
| 662 | 5.954   | fgenesh1_kg.07_#_10_#_4808_0_CCPB2375.b1_CCOZ_CCPA_CCPB_CCPC_EXT_A | -                                            |                                                                                    |
| 663 | 65.946  | fgenesh1_kg.07_#_94_#_0_0_A95E1_CCOZ_CCPA_CCPB_CCPC_EXT_A          | -                                            |                                                                                    |
| 664 | 18.614  | fgenesh1_pg.06_#_410                                               | -                                            |                                                                                    |
| 665 | 78.988  | fgenesh1_pm.02_#_834                                               | carbohydrate-binding module family 19        | Carbohydrate metabolism, Chitin Cell wall / membrane                               |
| 666 | 44.843  | fgenesh1_pm.07_#_10                                                | -                                            |                                                                                    |
| 667 | 10.95   | fgenesh1_pm.12_#_318                                               | short-chain dehydrogenase                    | Redox                                                                              |
| 668 | 61.373  | fgenesh1_pm.12_#_408                                               | -                                            |                                                                                    |
| 669 | 17.83   | Genemark.1079_g                                                    | -                                            |                                                                                    |
| 670 | 5.643   | gw1.07.642.1                                                       | -                                            |                                                                                    |
| 671 | 13.797  | gw1.13.1244.1                                                      | tetraspanin family protein                   | Cell wall / membrane                                                               |
| 672 | 4.708   | Hetan1.estExt_Genewise1.C_60500                                    | MFS glucose transporter                      | Carbohydrate metabolism, Glucose                                                   |
| 673 | 20.138  | Hetan1.estExt_Genewise1Plus.C_130459                               | aryl-alcohol oxidase 9, aao9                 | Redox Carbohydrate metabolism: production of hydrogen peroxidise to degrade lignin |
| 674 | 13.514  | Hetan1.estExt_Genewise1Plus.C_40642                                | RTA1-domain-containing protein               | Detoxification                                                                     |
| 675 | 4.213   | Hetan1.estExt_Genewise1Plus.C_60438                                | Dihydroorotate dehydrogenase 1, dhod1        | Nucleotide metabolism                                                              |
| 676 | 202.242 | Hetan1.EuGene10000523                                              | cytochrome P450 monooxygenase 20, cpm20      | Detoxification, Redox                                                              |
| 677 | 7.905   | Hetan1.EuGene6000302                                               | Thioesterase/thiol ester dehydrase-isomerase | Lipid metabolism                                                                   |
| 678 | 6.179   | Hetan1.EuGene6000314                                               | Lipase, class 3                              | Lipid metabolism                                                                   |
| 679 | 11.312  | Hetan1.fgenesh2_pg.C_scaffold_5000293                              | -                                            |                                                                                    |
| 680 | 4.234   | Hetan1.fgenesh2_pg.C_scaffold_5000294                              | -                                            |                                                                                    |
| 681 | 5.163   | Hetan1.fgenesh2_pm.C_scaffold_5000139                              | mitochondrial tricarboxylate transporter     | Mitochondria energy production                                                     |
| 682 | 5.111   | Hetan1.Genemark.5207_g                                             | -                                            |                                                                                    |
| 683 | 10.105  | Hetan1.Genemark.7627_g                                             | -                                            |                                                                                    |

**Table S3.** Statistical data from the RNA-Seq and RT-qPCR analyses.

| TG | Gene ID in <i>H. annosum</i> genome v.2.0 at JGI | RNA-Seq for <i>H. annosum</i>   |           | RT-qPCR for <i>H. annosum</i><br>(94233 vs 94233/32D) |                             | RT-qPCR for <i>H. parviporum</i><br>(RK15A* vs RK15A) |                             |
|----|--------------------------------------------------|---------------------------------|-----------|-------------------------------------------------------|-----------------------------|-------------------------------------------------------|-----------------------------|
|    |                                                  | Standard deviation <sup>1</sup> |           | Relative expression level                             | Standard error <sup>2</sup> | Relative expression level                             | Standard error <sup>2</sup> |
|    |                                                  | 94233                           | 94233/32D |                                                       |                             |                                                       |                             |
| 1  | fgenes1_pm.02_#_834                              | 802.453                         | 6.129     | 30.743                                                | 2.599                       | 30.910                                                | 20.910                      |
| 2  | Hetan1.estExt_Genewise1Plus.C_40642              | 12.025                          | 0.751     | 7.345                                                 | 1.074                       | 3.342                                                 | 0.623                       |
| 3  | gw1.13.1244.1                                    | 56.787                          | 3.553     | 11.886                                                | 2.279                       | 1.900                                                 | 1.034                       |
| 4  | Hetan1.estExt_Genewise1Plus.C_130459             | 57.032                          | 0.981     | 16.994                                                | 3.693                       | 5.080                                                 | 0.829                       |
| 5  | estExt_Genemark.C_120425                         | 90.256                          | 1.815     | 9.366                                                 | 5.823                       | ND                                                    | ND                          |
| 6  | Hetan1.fgenes2_pm.C_scaffold_2000190             | 12.242                          | 0.615     | 9.410                                                 | 1.472                       | 3.480                                                 | 0.685                       |
| 7  | e_gw1.13.1032.1                                  | 23.748                          | 1.200     | 4.988                                                 | 1.294                       | 6.300                                                 | 2.043                       |
| 8  | estExt_Genewise1Plus.C_010240                    | 583.099                         | 2.971     | 10.526                                                | 3.181                       | 0.680                                                 | 0.439                       |
| 9  | Genemark.3471_g                                  | 137.134                         | 14.954    | 17.683                                                | 11.969                      | 5.210                                                 | 1.376                       |
| 10 | estExt_fgenes1_pg.C_040344                       | 9.521                           | 0.22      | 21.899                                                | 6.577                       | ND                                                    | ND                          |
| 11 | Hetan1.estExt_Genewise1Plus.C_61257              | 165.231                         | 1.308     | 22.783                                                | 4.451                       | 4.500                                                 | 1.275                       |
| 12 | Hetan1.estExt_fgenes2_pm.C_70066                 | 31.225                          | 0.441     | 10.754                                                | 4.923                       | 1.140                                                 | 0.539                       |
| 13 | Hetan1.estExt_Genewise1Plus.C_100682             | 0.154                           | 6.377     | 0.074                                                 | 0.01                        | 2.810                                                 | 0.856                       |
| 14 | Hetan1.Genemark.6963_g                           | 0.515                           | 0.552     | 0.325                                                 | 0.079                       | 2.160                                                 | 0.486                       |
| 15 | Hetan1.Genemark.8846_g                           | 0.289                           | 3.876     | 0.178                                                 | 0.008                       | 1.980                                                 | 1.153                       |
| 16 | gw1.08.1665.1                                    | 0.240                           | 0.176     | 1                                                     | 0.512                       | 9.990                                                 | 3.150                       |
| 17 | fgenes1_pm.04_#_184                              | 0.020                           | 1.915     | -                                                     | -                           | 0.924                                                 | 0.153                       |
| 18 | estExt_fgenes1_pg.C_020714                       | 0.179                           | 5.631     | 0.117                                                 | 0.017                       | 0.957                                                 | 0.193                       |
| 19 | Hetan1.fgenes2_pg.C_scaffold_13000145            | 1.047                           | 5.356     | 0.053                                                 | 0.005                       | ND                                                    | ND                          |
| 20 | Hetan1.EuGene9000385                             | 0.692                           | 2.505     | 0.003                                                 | 0                           | 0.356                                                 | 0.055                       |
| 21 | Hetan1.EuGene1000636                             | 0                               | 1.300     | -                                                     | -                           | ND                                                    | ND                          |
| 22 | gw1.04.2473.1                                    | 0.775                           | 1.800     | 0.146                                                 | 0.070                       | 3.170                                                 | 2.236                       |
| 23 | Hetan1.estExt_Genewise1.C_110899                 | 1.813                           | 832.734   | 0.005                                                 | 0.001                       | 231.00                                                | 86.476                      |
| 24 | e_gw1.01.3559.1                                  | 4.425                           | 26.332    | 0.601                                                 | 0.204                       | 0.739                                                 | 0.148                       |
| 25 | Hetan1.estExt_fgenes3_kg.C_90130                 | 100.488                         | 1656.718  | 0.075                                                 | 0.025                       | 2.740                                                 | 0.389                       |
| 26 | Hetan1.estExt_Genewise1Plus.C_70955              | 0.028                           | 2.794     | 0.195                                                 | 0.122                       | 0.263                                                 | 0.050                       |
| 27 | Hetan1.estExt_fgenes2_pm.C_90173                 | 0.419                           | 4.721     | 0.092                                                 | 0.021                       | 0.249                                                 | 0.052                       |
| 28 | Hetan1.EuGene4000639                             | 2.037                           | 3.562     | 0.202                                                 | 0.075                       | 0.541                                                 | 0.093                       |

<sup>1</sup> Standard deviations for the mean expression values reported in Table 1

<sup>2</sup> Standard errors were determined using REST version 2009 (Qiagen)
